# Supplementary material for: Saliva for Diabetes’ Complications: Non-Invasive Diagnostics and Monitoring
Source: Preprints.org preprint supplement (doi:10.20944/preprints202309.0994.v1), 2023-09-14
Supplement: Supplementary file 1 [file supplementary]

## Sheet: FDR Protein Normalized TI MW
	Healthy					T2DM												Mann-Whitney U Test
Protein	D2859	D1163	D1392	D2853	D2851	D1682	D2894	D1978	D1726	D1968	Peptides per protein	Mean Healthy	Mean T2DM	Median Healthy	Median T2DM	%CV Healthy	%CV T2DM	p value	Fold Change -1/x	Fold Change
P0DUB6	0.340018	0.319448	0.291581	0.109404	0.0459437	0.111533	0.270537	0.222285	0.13611	0.130678	15	0.221279	0.174228	0.291581	0.13611	60.6046	39.4169	0.6901		0.4668
Q9HC84	0.00120559	0.00277084	0.00163475	0.00425533	0.00316007	0.00820394	0.00408548	0.00863052	0.0159374	0.0155971	15	0.00260532	0.0104909	0.00277084	0.00863052	46.8484	48.9438	0.0161		3.11477
P02768	0.0201481	0.0828417	0.091517	0.0884998	0.10055	0.272792	0.0699648	0.197586	0.12517	0.22914	15	0.0767112	0.178931	0.0884998	0.197586	42.0568	45.44	0.0951		2.23262
Q9Y6R7	0.000309177	0.000299757	0.000349523	0.000577995	0.000429406	0.000228291	0.000646774	0.000513846	0.00957756	0.00108534	13	0.000393172	0.00241036	0.000349523	0.000646774	29.3209	166.717	0.2221		1.85045
A8K2U0	0.00282782	0.00389953	0.00516579	0.0152735	0.0408593	0.00173283	0.00466992	0.00254399	0.00111169	0.00184712	15	0.0136052	0.00238111	0.00516579	0.00184712	117.783	57.8206	0.0321	-2.79667	0.357568
P35579	0.000324544	0.000264178	0.000309072	0.000133281	0.000180793	0.00019594	0.000121056	0.00026433	0.000194645	0.000541358	8	0.000242374	0.000263466	0.000264178	0.00019594	34.1285	62.0204	1.0001		0.741699
P01024	0.000556805	0.000875195	0.0010696	0.00102898	0.00128931	0.00376988	0.0014898	0.00372045	0.00117965	0.00395342	14	0.000963977	0.00282264	0.00102898	0.00372045	28.1667	48.3751	0.0161		3.61568
P02788	0.00203328	0.00339836	0.00914178	0.0020691	0.0018863	0.0300184	0.00686591	0.0108666	0.0385993	0.00874527	15	0.00370576	0.0190191	0.0020691	0.0108666	83.6437	75.4685	0.0321		5.25185
P01023	0.000185751	0.000981966	0.000871397	0.000613003	0.000511865	0.002689	0.000755899	0.00176662	0.000463771	0.00287809	13	0.000632796	0.00171068	0.000613003	0.00176662	49.5789	63.9656	0.2221		2.88192
P04114	0.0011125	0.000272259	0.000441557	0.000181418	0.000410614	0.000359695	0.00107342	0.000832518	0.000573992	0.000912503	9	0.000483669	0.000750425	0.000410614	0.000832518	75.8665	37.7575	0.3101		2.0275
P01833	0.0938491	0.0716381	0.113558	0.0798502	0.0523489	0.0500107	0.0917513	0.0615691	0.0887029	0.0332432	15	0.0822488	0.0650554	0.0798502	0.0615691	28.0375	38.6004	0.3101		0.771057
O43707	0.000136257	0.000149357	0.000198825	0.00101584	0.00128103	0.000316584	0.000488945	0.000363861	0.000268241	0.000500899	10	0.000556263	0.000387706	0.000198825	0.000363861	98.7206	26.7302	0.6901		1.83006
P08603	0.000171252	3.95435e-05	5.15005e-05	0.000119366	5.06023e-05	0.000169949	0.000119084	0.000194994	7.02296e-05	0.000174231	5	8.6453e-05	0.000145698	5.15005e-05	0.000169949	65.8954	34.7204	0.1511		3.29995
P02787	0.00364987	0.00321424	0.00440106	0.0033399	0.00568482	0.00939207	0.00440032	0.00868495	0.00481268	0.006048	15	0.00405798	0.0066676	0.00364987	0.006048	25.126	33.9178	0.0561		1.65704
Q9UGM3	0.00575324	0.00405279	0.00149089	0.00288868	0.00232136	0.0050329	0.00767816	0.00701919	0.0146594	0.00181546	15	0.00330139	0.00724102	0.00288868	0.00701919	50.1962	65.3565	0.1511		2.4299
P0C0L5	1.57493e-06	3.56068e-06	1.06962e-06	2.2353e-06	1.39819e-06	2.0601e-05	1.0715e-06	6.69356e-06	1.10607e-05	2.20958e-05	1	1.96775e-06	1.23045e-05	1.57493e-06	1.10607e-05	50.1439	73.1339	0.0951		7.02297
P14618	0.000324552	0.000351234	0.00360024	0.00899328	0.0130761	0.000629793	0.00310601	0.00114514	0.000996726	0.00324071	14	0.00526908	0.00182368	0.00360024	0.00114514	106.618	68.389	0.6901		0.318075
Q08188	0.000515464	0.000662646	0.00158975	0.00164373	0.0241015	0.00121632	0.00077058	0.00143173	0.00078447	0.00144576	14	0.00570262	0.00112977	0.00158975	0.00121632	180.588	29.5815	0.6901		0.765099
P22079	0.00516314	0.0118142	0.00646836	0.00277697	0.000835784	0.00445178	0.00248833	0.00834676	0.00602557	0.00794186	13	0.00541169	0.00585086	0.00516314	0.00602557	77.3295	41.775	0.8411		1.16704
P01876	0.103232	0.0322394	0.056955	0.0641208	0.0532863	0.0507293	0.0862071	0.0494835	0.057611	0.032042	15	0.0619667	0.0552146	0.056955	0.0507293	41.8622	35.7232	0.5481		0.890692
P04264	0.000551224	0.000445849	0.000232175	0.000308574	0.000222225	0.000455671	0.000339574	0.000460506	9.45786e-05	0.000197224	10	0.00035201	0.000309511	0.000308574	0.000339574	40.571	52.0643	0.8411		1.10046
P13796	0.000173329	0.000383529	0.000617515	0.000443474	0.000753281	0.00166494	0.000539251	0.00185714	0.000622949	0.00422444	13	0.000474226	0.00178174	0.000443474	0.00166494	46.9292	83.5896	0.0561		3.7543
P06737	0.000407874	0.000297601	0.000517102	0.000627218	0.00068694	0.000570645	0.000177299	0.000759815	0.000149896	0.00160334	11	0.000507347	0.0006522	0.000517102	0.000570645	31.2592	90.7337	1.0001		1.10354
P55786	0.000648033	0.000453077	0.00093524	0.00131027	0.00335249	0.000318055	0.000667426	0.00039895	0.00030842	0.000623337	13	0.00133982	0.000463237	0.00093524	0.00039895	87.3624	36.8414	0.0561		0.426575
P23280	0.00216065	0.0890754	0.0348232	0.00326593	0.00140234	0.0247781	0.00372675	0.0407035	0.0462544	0.0343494	14	0.0261455	0.0299624	0.00326593	0.0343494	144.968	55.7283	0.4211		10.5175
P00450	0.000167772	0.000601789	0.000709271	0.000343012	0.000365167	0.000967395	0.000258293	0.00121988	0.00084941	0.000971001	14	0.000437402	0.000853196	0.000365167	0.000967395	49.533	42.068	0.0951		2.64918
P02751	4.98761e-05	4.844e-05	5.43261e-05	4.97275e-05	8.3315e-05	0.000213711	5.69193e-05	0.000172524	0.000130765	0.000239294	7	5.71369e-05	0.000162643	4.98761e-05	0.000172524	25.9069	44.3101	0.0161		3.45905
P11021	0.000611869	0.000857529	0.00132042	0.00267612	0.00463576	0.000505521	0.0010013	0.000587275	0.000483227	0.00053335	15	0.00202034	0.000622135	0.00132042	0.00053335	82.4393	34.6387	0.0321	-2.47571	0.403925
P49327	1.75938e-05	3.81381e-05	3.21614e-05	8.31157e-05	6.62985e-05	1.46293e-05	9.64755e-05	5.80015e-05	5.68936e-05	0.00023827	4	4.74615e-05	9.28541e-05	3.81381e-05	5.80015e-05	56.1336	92.9341	0.5481		1.52083
P07237	0.000613129	0.000993665	0.00180731	0.00309477	0.00781496	0.000586464	0.00199452	0.000673406	0.000634742	0.000723343	15	0.00286477	0.000922495	0.00180731	0.000673406	102.138	65.1913	0.2221		0.3726
P05164	0.000710876	0.00104736	0.000843188	0.000360123	0.000435275	0.0164657	0.00138117	0.00335726	0.000406155	0.0038577	14	0.000679364	0.00509359	0.000710876	0.00335726	41.941	127.845	0.0951		4.72271
P98088	2.69928e-05	6.95592e-06	1.65035e-05	7.90467e-05	5.31415e-06	2.45031e-05	5.63921e-05	9.1142e-06	1.95504e-05	3.74024e-05	1	2.69626e-05	2.93924e-05	1.65035e-05	2.45031e-05	112.664	61.9244	0.5481		1.48472
P14780	0.000230781	0.000549886	0.00125588	0.000601087	0.000717512	0.00301144	0.00114503	0.00165372	0.000234655	0.0039393	14	0.000671028	0.00199683	0.000601087	0.00165372	55.6401	74.0733	0.1511		2.75122
P0DOX5	0.000431046	0.00174009	0.00241155	0.00216366	0.00225709	0.00629662	0.00127395	0.00500109	0.00193984	0.00429765	5	0.00180069	0.00376183	0.00216366	0.00429765	44.7111	56.009	0.3101		1.98629
P25311	0.0152915	0.0144859	0.0119385	0.0102201	0.00687334	0.00626885	0.010287	0.00762995	0.0083545	0.00722818	13	0.0117619	0.00795369	0.0119385	0.00762995	28.8898	18.9373	0.1511		0.639103
P26038	0.000372995	0.000327109	0.000333278	0.000290364	0.000926426	0.000807721	0.000836367	0.000886427	0.000378733	0.0023267	13	0.000450034	0.00104719	0.000333278	0.000836367	59.5329	71.0067	0.0951		2.50952
P01037	0.0176872	0.0192891	0.00966427	0.0833917	0.0147236	0.00693879	0.00815567	0.00812091	0.00744632	0.0156458	8	0.0289512	0.00926151	0.0176872	0.00812091	105.878	38.9205	0.0321	-2.17799	0.45914
P07900	0.000127904	0.000226597	0.000385323	0.000534447	0.000875228	0.0002648	8.91746e-05	0.000409132	0.000299459	0.000554729	8	0.0004299	0.000323459	0.000385323	0.000299459	68.1922	53.4878	0.8411		0.777165
P09960	0.000872057	0.000436808	0.000738014	0.00143625	0.0021841	0.00127344	0.00075974	0.000959937	0.000459017	0.00227929	12	0.00113345	0.00114628	0.000872057	0.000959937	60.8948	61.0099	0.8411		1.10077
P34932	0.000223632	0.000221918	0.000398108	0.00073962	0.00148046	0.000152434	0.000390999	0.000191401	0.000195999	0.000292884	12	0.000612748	0.000244743	0.000398108	0.000195999	86.3282	39.5355	0.0951		0.492326
P07996	5.44754e-05	5.39077e-05	6.65252e-05	9.69945e-05	8.15376e-05	0.000129782	7.3914e-05	0.000229627	0.000123682	8.0019e-05	5	7.06881e-05	0.000127405	6.65252e-05	0.000123682	26.1952	48.9785	0.0951		1.85918
P08779	1.87102e-05	5.26188e-06	3.87639e-05	4.69488e-05	4.0394e-05	0.000128881	3.87627e-05	5.30257e-05	6.36451e-05	4.37678e-05	4	3.00158e-05	6.56165e-05	3.87639e-05	5.30257e-05	57.9814	55.8051	0.0951		1.36791
P06733	0.00751019	0.00509926	0.010691	0.0164911	0.0443513	0.00398756	0.0127468	0.00473015	0.00332172	0.00903582	14	0.0168286	0.0067644	0.010691	0.00473015	94.8761	59.4322	0.1511		0.442441
P00558	0.000583241	0.00142436	0.00142594	0.00432086	0.00703577	0.000466907	0.00154795	0.00174169	0.00079704	0.00259078	14	0.00295803	0.00142887	0.00142594	0.00154795	90.7499	58.4141	0.6901		1.08556
P04406	0.00520478	0.00309031	0.00709356	0.021475	0.0561774	0.0049614	0.00757809	0.00494966	0.00315368	0.0128599	13	0.0186082	0.00670054	0.00709356	0.0049614	119.343	56.524	0.5481		0.699424
Q8TDL5	0.000628175	0.000644175	0.000466251	0.000151898	0.000416551	0.000517096	0.00114763	0.000697814	0.0134077	0.00157537	14	0.00046141	0.00346911	0.000466251	0.00114763	43.2161	160.589	0.0321		2.46139
P29401	0.000588918	0.00121851	0.00109635	0.00303508	0.00536079	0.00468543	0.000988645	0.00296157	0.00055296	0.00752895	13	0.00225993	0.00334351	0.00121851	0.00296157	86.9554	85.6416	1.0001		2.4305
P06396	0.000300845	0.000632315	0.000503736	0.00136206	0.00207819	0.00315662	0.00134169	0.00150097	0.00217509	0.00359508	13	0.000975429	0.00235389	0.000632315	0.00217509	75.3506	42.3174	0.0561		3.43988
P04075	0.000472911	0.000773916	0.00224248	0.00436162	0.0101444	0.00125217	0.00228942	0.0010207	0.000559214	0.00189124	12	0.00359907	0.00140255	0.00224248	0.00125217	110.284	49.2038	0.6901		0.558389
P30740	0.00142341	0.00252951	0.00520913	0.0102724	0.0249702	0.00306042	0.00349887	0.00189684	0.00119248	0.0040819	14	0.00888093	0.0027461	0.00520913	0.00306042	108.331	43.0286	0.3101		0.58751
P19013	0.00119305	0.000194124	0.00176866	0.000632692	0.00122357	0.000124305	0.000478941	0.000148359	0.00120532	0.000414572	14	0.00100242	0.0004743	0.00119305	0.000414572	60.3193	92.3068	0.1511		0.347489
P06744	0.000924709	0.000985008	0.00193625	0.00311626	0.00674011	0.00240875	0.00233589	0.00212206	0.00081638	0.00390562	12	0.00274047	0.00231774	0.00193625	0.00233589	87.8111	47.3733	1.0001		1.2064
P35527	0.00067245	0.000781534	0.000272862	0.000337549	0.000271705	0.000511849	0.000512644	0.000682182	0.00019235	0.000284354	8	0.00046722	0.000436676	0.000337549	0.000511849	51.7373	45.02	1.0001		1.51637
P00338	0.00152845	0.00130985	0.00300554	0.00415483	0.00952432	0.00142604	0.00258702	0.002568	0.00167069	0.00403753	15	0.0039046	0.00245786	0.00300554	0.002568	85.7399	41.7325	0.6901		0.854424
P01009	0.00133743	0.00218326	0.00248692	0.00200115	0.00245164	0.00626497	0.00223566	0.00600741	0.00296035	0.00801147	14	0.00209208	0.00509597	0.00218326	0.00600741	22.3081	47.5027	0.0321		2.75158
P18206	2.96171e-05	6.45172e-05	0.00010527	0.000101317	0.000239111	0.000121968	8.87758e-05	0.000202152	8.25969e-05	0.000299825	8	0.000107967	0.000159064	0.000101317	0.000121968	73.6281	57.8198	0.4211		1.20382
P00738	0.00073083	0.000507226	0.000645598	0.000892619	0.00181981	0.00729759	0.000924894	0.0062482	0.00240091	0.00323759	13	0.000919217	0.00402184	0.00073083	0.00323759	56.8379	66.3935	0.0161		4.43002
P09211	0.00257056	0.00368795	0.00756967	0.0121182	0.0367757	0.00279618	0.00956334	0.00253509	0.0024331	0.00326669	14	0.0125444	0.00411888	0.00756967	0.00279618	112.03	74.3057	0.1511		0.369393
Q96HE7	0.000395386	0.000897857	0.00137496	0.00308919	0.00768966	0.000260826	0.00132734	0.00051581	0.000425717	0.000665131	15	0.00268941	0.000638964	0.00137496	0.00051581	110.556	64.4411	0.1511		0.375147
P13797	0.000119973	0.00021917	0.000272352	0.000594283	0.00194784	0.00065064	0.000348407	0.000264048	0.000154962	0.00072536	12	0.000630724	0.000428683	0.000272352	0.000348407	120.089	57.8208	0.8411		1.27925
P29508	0.000576364	0.000491645	0.000490023	0.00125217	0.00256411	0.000423057	0.00165072	0.000560154	0.000615059	0.000394718	9	0.00107486	0.000728742	0.000576364	0.000560154	82.9524	71.8425	0.5481		0.971877
P04280	0.000929771	0.000266585	0.000380359	0.000198354	6.43384e-05	1.29815e-05	0.000132914	1.45341e-05	5.11635e-05	1.45807e-05	5	0.000367881	4.52348e-05	0.000266585	1.45807e-05	90.8705	114.045	0.0161	-18.2834	0.0546944
P02679	0.000250233	0.000298768	0.000252926	0.000153671	0.000308201	0.00310254	0.000362684	0.000592902	0.000312344	0.00328662	13	0.00025276	0.00153142	0.000252926	0.000592902	24.24	99.4714	0.0081		2.34417
Q96G03	0.000434715	0.000422683	0.000563856	0.00112222	0.00188139	0.00033375	0.000615892	0.000248898	0.000290474	0.000320912	13	0.000884973	0.000361985	0.000563856	0.000320912	70.7635	40.2364	0.0561		0.569138
P02538	0.000106007	4.15972e-05	5.8314e-05	0.000144895	1.63407e-05	8.3454e-05	0.000122432	0.000145734	0.000207632	0.000146561	3	7.34309e-05	0.000141163	5.8314e-05	0.000145734	70.3339	31.975	0.0561		2.49913
Q16610	0.000340958	0.000316264	0.000507233	0.00054253	0.00155533	0.000359085	0.000326528	0.000558447	0.000274537	0.000456924	14	0.000652462	0.000395104	0.000507233	0.000359085	78.839	28.5897	0.5481		0.707929
P52209	0.000915614	0.00115181	0.00302277	0.00802596	0.0160647	0.00143456	0.00197334	0.00216166	0.00119448	0.00361291	14	0.00583616	0.00207539	0.00302277	0.00197334	109.543	45.5105	0.8411		0.652826
P22314	0.000233405	0.000303932	0.000626458	0.000703773	0.00124478	0.000205444	0.000259786	0.000325431	0.000137471	0.000511189	13	0.000622469	0.000287864	0.000626458	0.000259786	64.5973	49.5816	0.1511		0.414689
P11142	0.000671485	0.0011157	0.00147905	0.00194852	0.00480294	0.000970523	0.00168934	0.00116609	0.000683876	0.00151473	12	0.00200354	0.00120491	0.00147905	0.00116609	81.5463	33.6759	0.6901		0.788401
P46940	0.00010875	0.000194302	8.64181e-05	6.67773e-05	0.000194142	0.00016338	4.89681e-05	0.000136884	6.9107e-05	0.000248859	5	0.000130078	0.000133439	0.00010875	0.000136884	46.4407	59.8398	1.0001		1.2587
P02675	0.00035515	0.000352429	0.000257352	0.00018885	0.000245468	0.00309386	0.00022985	0.00104364	0.000481591	0.00327207	15	0.00027985	0.0016242	0.000257352	0.00104364	25.834	89.5512	0.0951		4.05528
P13645	0.00123686	0.000579243	0.000339064	0.000696894	0.000242887	0.000810956	0.000396	0.000443941	0.000160734	0.000157045	11	0.000618989	0.000393735	0.000579243	0.000396	63.0485	68.0203	0.4211		0.68365
P50395	5.43297e-05	0.000224047	0.000154184	0.000126879	0.000717113	0.000304179	0.000164654	0.000373151	0.000205457	0.000366966	8	0.00025531	0.000282881	0.000154184	0.000304179	103.879	33.3705	0.3101		1.97284
P0DMV9	0.000905171	0.00106673	0.00150766	0.00183225	0.00453723	0.00126869	0.00213911	0.00186927	0.000816706	0.00254884	11	0.00196981	0.00172852	0.00150766	0.00186927	75.1837	39.9162	0.8411		1.23985
Q9UIV8	0.000385778	0.000666024	0.000974586	0.00232549	0.00606132	0.000335044	0.00124384	0.000658696	0.000761716	0.000340779	13	0.00208264	0.000668015	0.000974586	0.000658696	112.615	55.9313	0.2221		0.675872
P01871	0.000919726	0.000362305	0.0003488	0.00064272	0.000687697	0.000172668	0.000249317	0.000274671	0.000835277	0.000300347	4	0.00059225	0.000366456	0.00064272	0.000274671	40.5797	72.6947	0.0951		0.427357
P04040	0.000128606	0.000226847	0.000254247	0.000415012	0.000371066	0.000985896	0.000494645	0.000622714	0.0001475	0.00127538	13	0.000279156	0.000705227	0.000254247	0.000622714	41.2059	62.0544	0.0951		2.44925
P12273	0.0471455	0.059895	0.0240198	0.124918	0.0132766	0.021876	0.0336688	0.0274801	0.0313073	0.0246848	12	0.0538511	0.0278034	0.0471455	0.0274801	81.3062	17.2158	0.5481		0.582878
Q96DR5	0.000633147	0.0130698	0.00567374	0.00213364	0.00137496	0.00282333	0.000659461	0.0158017	0.0149957	0.00992816	14	0.00457705	0.00884167	0.00213364	0.00992816	111.995	78.0853	0.3101		4.65315
P17174	0.000267262	0.000393125	0.00029721	0.000651796	0.00165786	0.000401717	0.000497514	0.000202673	0.000106699	0.000401066	11	0.00065345	0.000321934	0.000393125	0.000401066	88.9921	50.0876	0.5481		1.0202
O75882	1.22135e-06	5.71701e-06	4.4036e-06	5.79571e-06	5.53683e-06	7.37959e-06	4.79962e-06	7.27921e-06	3.02804e-06	3.35997e-06	1	4.5349e-06	5.16929e-06	5.53683e-06	4.79962e-06	42.6846	40.2689	0.8411		0.866852
P04083	0.000336066	0.000274494	0.000611021	0.000459066	0.00210211	0.000702191	0.000454905	0.000219664	0.000432375	0.000364804	10	0.000756551	0.000434787	0.000459066	0.000432375	100.868	40.3465	0.6901		0.941857
P61626	0.0015737	0.000779918	0.0153401	0.00173456	0.000699457	0.00121657	0.00116841	0.000496825	0.0132993	0.00130714	10	0.00402555	0.00349764	0.0015737	0.00121657	157.54	156.926	0.6901		0.773062
P12814	0.000864264	0.000207925	0.000158453	0.000234167	0.00024614	0.000355722	0.000851722	0.000264987	0.000229973	0.00055211	9	0.00034219	0.000450903	0.000234167	0.000355722	85.8549	56.9036	0.3101		1.5191
Q9UBG3	0.000227047	0.000194572	0.000408365	0.000558876	0.00171183	0.000139095	0.000775665	0.000298449	9.15425e-05	0.000210509	9	0.000620139	0.000303052	0.000408365	0.000210509	101.219	90.9032	0.3101		0.515492
P07476	0.000357506	0.00522955	0.000274754	0.000222773	0.000259973	0.000971691	0.000678841	0.0035391	0.00206379	0.00055245	9	0.00126891	0.00156118	0.000274754	0.000971691	174.529	80.4408	0.1511		3.53658
Q6P5S2	0.00473312	0.00612484	0.00720176	0.0168781	0.00543547	0.00341223	0.00881552	0.00298589	0.00580524	0.00394742	13	0.00807465	0.00499326	0.00612484	0.00394742	61.9825	47.9101	0.2221		0.644493
P02790	0.000596256	0.000964881	0.00151086	0.00118317	0.00185619	0.00459724	0.00177328	0.00399487	0.00208746	0.00433712	9	0.00122227	0.00335799	0.00118317	0.00399487	39.7625	39.4669	0.0161		3.37642
Q9Y6U3	0.000144875	8.75113e-05	0.000187647	0.000295219	0.000400183	0.000136506	0.000410889	0.000144399	0.000125453	0.000186002	9	0.000223087	0.00020065	0.000187647	0.000144399	55.9511	59.6749	0.6901		0.769521
P11413	6.76391e-05	0.00030442	0.000409754	0.000358313	0.000918996	0.000900603	0.000442623	0.000564802	0.000368788	0.00128001	12	0.000411825	0.000711366	0.000358313	0.000564802	75.8298	53.0766	0.1511		1.57628
P21333	4.6507e-05	2.68504e-05	2.84209e-05	0.00011243	0.000100879	0.000145633	0.000238129	5.45116e-05	2.12666e-05	0.0001333	4	6.30174e-05	0.000118568	4.6507e-05	0.0001333	64.7153	71.5835	0.3101		2.86623
P60174	0.00342638	0.00297223	0.00628084	0.00717666	0.0212883	0.00224681	0.00759593	0.00275558	0.00165362	0.00333988	15	0.00822889	0.00351837	0.00628084	0.00275558	91.3745	67.1608	0.1511		0.438728
Q02487	0.000928237	0.000413918	0.000431586	0.000978791	0.000672216	0.000350803	0.0007778	0.000421215	0.00129677	0.000263303	13	0.00068495	0.000621979	0.000672216	0.000421215	38.857	68.3122	0.5481		0.626608
P30838	0.000693801	0.000468903	0.00106296	0.00207609	0.00758327	0.000340608	0.00159635	0.000450167	0.000364898	0.000317502	14	0.002377	0.000613904	0.00106296	0.000364898	125.147	89.8328	0.0561		0.343284
P02774	0.000516149	0.000619688	0.00101294	0.000655452	0.000868961	0.00134311	0.000731321	0.00123413	0.000700833	0.00130165	13	0.000734639	0.00106221	0.000655452	0.00123413	27.4546	29.9884	0.0951		1.88286
P18669	0.000410013	0.000688996	0.000645717	0.00131718	0.00263845	0.000935345	0.000304037	0.000624011	0.000303438	0.00110319	11	0.00114007	0.000654005	0.000688996	0.000624011	79.1535	55.5105	0.3101		0.905681
P36952	0.0006874	0.00105276	0.00158822	0.00224392	0.00551221	0.000199809	0.000584774	0.000736504	0.000780564	0.000414989	12	0.0022169	0.000543328	0.00158822	0.000584774	87.2045	44.1139	0.0321	-2.71595	0.368195
P30041	0.00155776	0.000658865	0.00189816	0.0019568	0.00372831	0.000637024	0.00186348	0.000599726	0.00044618	0.000781688	13	0.00195998	0.00086562	0.00189816	0.000637024	56.9604	65.901	0.0561		0.335601
P13646	0.00113846	0.000256747	0.0015688	0.000980744	0.00106005	0.00014659	0.000808904	7.06614e-05	0.000453758	0.000483973	9	0.00100096	0.000392777	0.00106005	0.000453758	47.3649	75.2639	0.0561		0.428054
P52790	0.000170448	0.000241338	0.000712532	0.000276317	9.80586e-05	0.000164044	0.000226694	0.00022303	0.000129898	0.000513318	9	0.000299739	0.000251397	0.000241338	0.00022303	80.3037	60.4602	0.6901		0.924138
P14550	0.00107041	0.000392274	0.000633846	0.00121057	0.00297619	0.000214081	0.000389991	0.000438031	0.000204717	0.000481247	14	0.00125666	0.000345613	0.00107041	0.000389991	80.8458	37.1833	0.0321	-2.7447	0.364339
P05120	0.000438117	0.000280801	0.000569807	0.000675122	0.00243675	0.000328223	0.000513855	0.000379354	0.000223967	0.000351868	14	0.00088012	0.000359453	0.000569807	0.000351868	100.282	29.0534	0.1511		0.617522
P21128	0.000726959	0.000499417	0.000740922	0.00121174	0.00355148	0.000486244	0.000636741	0.000467727	0.000175263	0.000426244	14	0.0013461	0.000438444	0.000740922	0.000467727	93.5873	38.144	0.0161	-1.58409	0.631277
P62258	0.000148597	0.000194269	9.98929e-05	0.000374904	0.000991475	0.000177662	0.000243217	0.000177651	0.000154584	0.000240709	6	0.000361827	0.000198765	0.000194269	0.000177662	101.432	20.4028	1.0001		0.914518
P27487	6.80036e-05	5.75233e-05	9.54417e-05	0.000104733	3.98237e-05	5.94329e-05	9.10573e-05	7.18823e-05	8.10326e-05	4.41385e-05	3	7.31051e-05	6.95087e-05	6.80036e-05	7.18823e-05	36.6772	26.4099	1.0001		1.05704
P28325	0.00200934	0.00168137	0.00023621	0.0054524	0.000657153	0.00254395	0.00665279	0.00332282	0.00260283	0.00786722	9	0.00200729	0.00459792	0.00168137	0.00332282	102.505	54.0844	0.0561		1.97626
P11216	0.000117739	0.000137002	6.49414e-05	9.93854e-05	0.000208053	0.000105364	0.000192326	8.30392e-05	4.11802e-05	0.000122326	5	0.000125424	0.000108847	0.000117739	0.000105364	42.4832	51.1674	0.6901		0.89489
P01011	0.000466061	0.000607142	0.000479259	0.000669683	0.000799517	0.0015784	0.00124077	0.00172815	0.00258789	0.00145108	11	0.000604332	0.00171726	0.000607142	0.0015784	22.9789	30.1924	0.0081		2.59972
P00491	0.000140683	0.000346661	0.000282895	0.000846414	0.00162911	0.000380075	0.000300931	0.000514742	0.00034203	0.000897395	9	0.000649152	0.000487035	0.000346661	0.000380075	93.8111	49.901	0.8411		1.09639
Q02413	0.00074689	0.000332839	0.00047342	0.00149212	0.00165745	0.000253582	0.00085409	0.000587905	0.000578455	0.000361404	12	0.000940545	0.000527087	0.00074689	0.000578455	63.8638	44.0388	0.4211		0.774484
Q8WUM4	0.000116389	5.57224e-05	0.000108409	0.000197745	0.000446913	5.66483e-05	0.000104174	7.31696e-05	9.77729e-05	0.000312407	9	0.000185036	0.000128834	0.000116389	9.77729e-05	83.7446	81.0191	0.4211		0.84005
P68871	5.52142e-05	2.80646e-05	5.97621e-05	0.0001171	4.27795e-05	0.00423832	0.00017946	0.00125342	9.17184e-05	0.00302434	7	6.05841e-05	0.00175745	5.52142e-05	0.00125342	55.963	103.672	0.0161		22.701
P0DOX2	0.0316534	0.00544207	0.0088932	0.013952	0.00788076	0.0101128	0.0432424	0.00689513	0.0113443	0.00625138	9	0.0135643	0.0155692	0.0088932	0.0101128	77.9739	100.303	1.0001		1.13714
P35908	0.000621892	0.000269979	0.000184434	0.000231202	0.000113213	0.000287276	0.00013105	0.000156405	0.000143846	3.12871e-05	6	0.000284144	0.000149973	0.000231202	0.000143846	69.5542	60.9075	0.3101		0.622166
O15144	0.000103411	0.000162493	0.00022834	0.000310054	0.000581342	0.000671157	0.000227235	0.000459997	0.000199345	0.00121028	8	0.000277128	0.000553604	0.00022834	0.000459997	67.3458	74.7959	0.3101		2.01452
Q08380	0.00131	0.000865023	0.00165944	0.00141096	0.000761976	0.00107955	0.0012757	0.00175251	0.00233032	0.00151757	10	0.00120148	0.00159113	0.00131	0.00151757	31.4671	30.4518	0.3101		1.15844
P26639	0.000461637	0.000626919	0.000277059	0.000382136	0.00108804	0.00044327	0.000884866	0.000641336	0.000367531	0.000341466	13	0.000567157	0.000535694	0.000461637	0.00044327	56.0632	42.53	1.0001		0.960213
P16152	0.00025187	0.000158093	0.000391573	0.00048688	0.00139622	0.000390274	0.00035893	0.000276467	0.000684644	0.000395673	11	0.000536928	0.000421197	0.000391573	0.000390274	92.5055	36.7493	1.0001		0.996681
P32926	0.000585571	0.000316312	0.000466291	0.000945787	0.00112028	0.000413655	0.000812089	0.000499066	0.00121693	0.000438923	11	0.000686849	0.000676132	0.000585571	0.000499066	48.8937	50.5603	1.0001		0.852271
Q01518	0.000299972	0.000879872	0.000586569	0.00104086	0.00218736	0.00188392	0.00107452	0.00126903	0.000577938	0.0026058	11	0.000998927	0.00148224	0.000879872	0.00126903	72.3077	52.8343	0.3101		1.44229
P23526	9.29813e-05	0.000218548	0.000314333	0.000623308	0.00171716	9.03781e-05	0.000368966	0.000133834	0.000131571	0.000191628	9	0.000593266	0.000183275	0.000314333	0.000133834	110.933	59.956	0.2221		0.42577
P07858	0.000227999	0.000365132	0.00017196	0.000110609	9.75254e-05	0.00017097	0.000101285	0.000187543	0.0002229	0.000126724	5	0.000194645	0.000161884	0.00017196	0.00017097	55.8006	29.9014	0.8411		0.994243
P61158	7.99548e-05	6.02737e-05	0.000138143	0.000246173	0.000505864	7.2078e-05	0.000175616	0.000478848	7.37087e-05	0.0010217	7	0.000206082	0.00036439	0.000138143	0.000175616	88.5688	110.689	0.8411		1.27127
P02647	0.000169184	0.000901762	0.000200534	0.000110094	0.000154095	0.00130895	0.000406686	0.00137809	0.0011644	0.00199299	7	0.000307134	0.00125022	0.000169184	0.00130895	108.747	45.4305	0.0161		7.73682
P09958	0.000249389	0.000215437	8.99408e-05	0.000165333	8.73789e-05	9.34322e-05	0.000224043	0.000178124	0.000126195	0.000114786	7	0.000161496	0.000147316	0.000165333	0.000126195	45.1461	35.9899	1.0001		0.763273
P54108	0.00248844	0.00286704	0.00346901	0.00506288	0.00259296	0.00273765	0.00307129	0.00300555	0.00366859	0.00358182	14	0.00329607	0.00321298	0.00286704	0.00307129	32.116	12.378	0.5481		1.07124
P13639	6.01499e-05	0.000166363	0.000156398	0.000192973	0.000411314	0.000173567	0.00016032	0.000230633	0.000252771	0.000322642	7	0.000197439	0.000227987	0.000166363	0.000230633	65.6776	28.6964	0.4211		1.38633
Q14914	0.000145917	0.000139024	0.000186276	0.000671769	0.00128129	0.000344012	0.000213385	0.000412999	0.000106005	0.000113499	9	0.000484854	0.00023798	0.000186276	0.000213385	102.755	57.689	0.5481		1.14553
P18510	0.00267139	0.00262807	0.00730549	0.00806943	0.0235662	0.00122628	0.00611827	0.00120722	0.00117372	0.00108878	13	0.00884812	0.00216286	0.00730549	0.00120722	97.2959	102.262	0.0321	-6.0515	0.165248
P15311	0.000256261	0.000343776	0.000454802	0.000572557	0.00201873	0.000283777	0.000316969	0.000195081	0.000373775	0.000290394	9	0.000729225	0.000291999	0.000454802	0.000290394	100.185	22.1772	0.1511		0.638506
P31947	0.000162056	0.000323941	0.00125782	0.0022122	0.003663	0.000541687	0.00158055	0.000235048	0.000265236	0.000834611	7	0.0015238	0.000691426	0.00125782	0.000541687	95.1839	79.9843	0.5481		0.430655
P37837	0.000597573	0.000825201	0.00117809	0.00195258	0.00440452	0.00168941	0.00181499	0.00115404	0.000500222	0.00230531	9	0.00179159	0.0014928	0.00117809	0.00168941	86.422	46.2001	1.0001		1.43403
Q9NY33	6.53975e-05	0.000123926	0.000141629	0.000275424	0.000488069	9.37839e-05	0.000201526	0.000113044	5.28691e-05	0.000130786	6	0.000218889	0.000118402	0.000141629	0.000113044	77.1935	46.2448	0.3101		0.798176
Q16851	0.000156289	0.000138543	0.0001506	0.000229472	0.00069469	0.000175576	0.000138636	0.000171225	4.44001e-05	0.000290096	6	0.000273919	0.000163987	0.000156289	0.000171225	86.8523	53.7129	0.8411		1.09557
P27797	0.000367091	0.000595525	0.000353513	0.000631895	0.00101501	0.000405728	0.000232359	0.000299434	0.000300763	0.000419781	10	0.000592607	0.000331613	0.000595525	0.000300763	45.2792	23.8902	0.0951		0.505039
Q01469	0.000273078	0.000200852	0.000234835	0.00288098	0.00305579	0.00144716	0.000238387	0.00199529	0.00174404	0.000625732	8	0.00132911	0.00121012	0.000273078	0.00144716	112.703	61.888	0.8411		5.29944
P80188	0.000755525	0.000752685	0.000952642	0.00149385	0.00211496	0.00320638	0.00275249	0.00204952	0.00209951	0.00344696	9	0.00121393	0.00271097	0.000952642	0.00275249	48.4093	23.3312	0.0321		2.88932
P05109	0.000246081	0.000647844	0.00181155	0.00130925	0.00296836	0.00180388	0.000878342	0.010466	0.00128275	0.0261258	9	0.00139662	0.00811135	0.00130925	0.00180388	76.2361	133.465	0.4211		1.37779
P30086	0.00022119	0.000243858	0.000523789	0.000638658	0.00172196	0.00035841	0.000617663	0.000385831	0.000177224	0.000284666	7	0.000669891	0.000364759	0.000523789	0.00035841	91.7788	44.6351	0.5481		0.684264
P43490	0.000974402	0.000266777	0.000342467	0.000686287	0.00133082	0.000306722	0.000461035	0.000153399	0.000574664	0.00178274	7	0.00072015	0.000655711	0.000686287	0.000461035	61.5894	99.0928	0.6901		0.671781
Q96DA0	0.00198549	0.00851938	0.0223607	0.00627887	0.00160498	0.0357683	0.00191229	0.0141026	0.077988	0.0377262	13	0.00814988	0.0334995	0.00627887	0.0357683	103.829	86.7257	0.1511		5.69661
O60218	0.000152335	0.00290777	0.000169058	0.00310633	0.0029114	0.000640133	0.00321798	0.00175294	0.00312431	0.000145638	7	0.00184938	0.0017762	0.00290777	0.00175294	83.4687	78.8503	0.8411		0.602846
P01034	0.000172123	0.000820062	0.00104721	0.000633576	0.000355837	0.000224223	0.000216866	0.0013201	0.00180062	0.000326341	7	0.000605762	0.000777629	0.000633576	0.000326341	57.901	94.6111	1.0001		0.515077
P35237	0.00030349	0.000300905	0.00028998	0.000438595	0.00156257	0.000246554	0.00050143	0.000545106	0.000142778	0.000190127	9	0.000579108	0.000325199	0.00030349	0.000246554	95.5175	56.9346	0.4211		0.812396
P62937	0.00104269	0.00139703	0.00213428	0.00309617	0.0067962	0.00143726	0.00128978	0.00202211	0.000769659	0.0021248	12	0.00289327	0.00152872	0.00213428	0.00143726	80.156	36.4265	0.3101		0.673419
Q14697	0.000136909	0.000119126	4.57396e-05	0.000273018	0.000747096	6.90729e-05	0.000204774	0.000150095	6.79186e-05	0.000148222	4	0.000264378	0.000128017	0.000136909	0.000148222	106.69	46.0043	0.8411		1.08263
O00462	0.000244851	0.000344196	8.68585e-05	0.000148441	9.07099e-05	0.000258396	0.000269423	0.000110123	0.000232738	0.000252609	4	0.000183011	0.000224658	0.000148441	0.000252609	60.3316	29.1095	0.4211		1.70174
P30101	6.30936e-05	0.000735728	0.000149336	0.000149504	0.000383931	0.000128231	6.31581e-05	0.00132408	0.000138241	0.000152883	8	0.000296318	0.000361319	0.000149504	0.000138241	92.1604	149.257	0.8411		0.924668
P08670	0.000198133	0.000120452	0.000213641	0.000145711	0.000236131	0.000554401	0.000164043	0.00027278	6.12262e-05	0.000183563	8	0.000182814	0.000247203	0.000198133	0.000183563	26.366	75.8359	0.8411		0.926463
P48595	3.53557e-05	5.269e-05	5.30075e-05	9.75467e-05	6.19893e-05	0.00021535	0.000166605	0.000245335	6.21004e-05	0.000554512	5	6.01179e-05	0.000248781	5.30075e-05	0.00021535	38.3243	74.1734	0.0161		4.06263
P00751	0.00050231	0.000119914	0.000138469	6.30508e-05	0.00015045	0.00027722	0.000106388	0.000395312	0.00029116	0.000339735	5	0.000194839	0.000281963	0.000138469	0.00029116	89.8796	38.4926	0.4211		2.1027
Q14515	3.60527e-05	0.000109889	8.48134e-05	0.000165923	6.63754e-05	6.17481e-05	7.1601e-05	6.91141e-05	0.000127041	9.56779e-05	6	9.26106e-05	8.50363e-05	8.48134e-05	7.1601e-05	52.9567	31.4116	1.0001		0.844218
P23284	0.00230603	0.00156671	0.000790776	0.000922162	0.000888196	0.0018784	0.00338273	0.00243301	0.00578649	0.000363783	6	0.00129477	0.00276888	0.000922162	0.00243301	49.6754	72.6208	0.2221		2.63837
Q9HC38	0.000147196	0.000236916	0.000286803	0.000378557	0.000858196	0.000107571	0.000292622	0.000125657	0.000236865	0.000196081	8	0.000381533	0.000191759	0.000286803	0.000196081	73.2028	40.1271	0.1511		0.683678
P19021	9.55363e-05	0.000163976	5.05763e-05	0.000149155	8.13506e-05	8.5233e-05	9.74981e-05	9.34803e-05	0.000128484	0.000116834	5	0.000108119	0.000104306	9.55363e-05	9.74981e-05	43.8477	17.0752	1.0001		1.02053
P09228	0.00199408	0.000942275	0.000344996	0.00470964	0.00140246	0.00165735	0.000952118	0.000493597	0.000334924	0.0012453	5	0.00187869	0.000936658	0.00140246	0.000952118	90.1885	57.8216	0.4211		0.678889
O00748	0.000372813	0.000523019	0.000455769	0.000922237	0.00361798	0.000405101	0.000854898	0.00043626	0.000260561	0.000374632	10	0.00117836	0.00046629	0.000523019	0.000405101	117.113	48.7142	0.2221		0.774543
P0DOY2	9.36388e-06	6.73172e-05	4.89276e-05	5.45236e-05	2.42336e-05	0.000152896	0.000100436	0.000111491	0.000150704	0.000250639	3	4.08732e-05	0.000153233	4.89276e-05	0.000150704	57.6405	38.6419	0.0081		3.08015
Q06830	0.000171301	0.000270142	0.000860115	0.000682487	0.00262314	0.000366251	0.000549935	0.000363806	0.000423225	0.000269901	8	0.000921437	0.000394624	0.000682487	0.000366251	107.757	26.0436	0.5481		0.536642
O75083	0.000132171	0.000150135	0.00024178	0.000216188	0.000303871	8.85044e-05	0.00013122	0.000210755	8.24963e-05	0.000409593	5	0.000208829	0.000184514	0.000216188	0.00013122	33.4297	73.623	0.3101		0.606971
P47756	5.95845e-05	8.07472e-05	0.000112664	0.000165463	0.000368698	0.000219295	6.35047e-05	0.000176644	6.01834e-05	0.00032262	6	0.000157431	0.000168449	0.000112664	0.000176644	79.1814	65.8096	0.8411		1.56788
P19823	1.02305e-05	2.6063e-05	1.28267e-05	4.52432e-05	2.81458e-05	3.11236e-05	1.57403e-05	6.37069e-05	2.86104e-05	7.37842e-05	3	2.45018e-05	4.25931e-05	2.6063e-05	3.11236e-05	57.2078	58.3041	0.1511		1.19417
P14625	0.00010467	8.00579e-05	7.55372e-05	0.000144298	0.000366618	0.000138554	0.000147304	0.000119027	0.000158725	0.00011407	5	0.000154236	0.000135536	0.00010467	0.000138554	78.9809	13.895	0.4211		1.32373
P13647	0.000240371	5.9194e-05	0.000174216	0.000220571	0.000137328	0.000145864	0.000162667	5.42532e-05	0.000177743	0.000104479	8	0.000166336	0.000129001	0.000174216	0.000145864	43.3584	38.7246	0.4211		0.837256
P63104	0.000180688	0.000605085	0.00115958	0.00292625	0.0075824	0.000284269	0.00052894	0.00049557	0.000292574	0.000695275	7	0.0024908	0.000459326	0.00115958	0.00049557	121.739	37.7529	0.2221		0.427371
Q8N4F0	0.000375793	0.00157027	0.00294107	0.00695398	0.0037477	0.00199197	0.00214515	0.002217	0.010533	0.00425523	13	0.00311776	0.00422848	0.00294107	0.002217	80.2782	86.195	0.6901		0.753807
P07737	0.000147838	0.000167041	0.00143437	0.00213167	0.00389348	0.00148687	0.001395	0.00135538	0.000528005	0.00261359	6	0.00155488	0.00147577	0.00143437	0.001395	100.266	50.413	1.0001		0.972555
P20061	0.00223541	0.00350238	0.00323023	0.00386682	0.00206024	0.00166694	0.00344188	0.00236947	0.00367717	0.00168057	11	0.00297902	0.00256721	0.00323023	0.00236947	26.6561	37.1217	0.5481		0.73353
P40925	0.000576787	0.000614523	0.000566254	0.00101286	0.00275934	0.000540898	0.000817316	0.000497153	0.00040669	0.000728006	9	0.00110595	0.000598013	0.000614523	0.000540898	85.2437	28.3575	0.2221		0.880192
P48163	7.41608e-05	0.000214746	0.000106675	0.000345839	0.000550623	4.41442e-05	0.000273026	0.000100186	0.00010394	6.45859e-05	5	0.000258409	0.000117176	0.000214746	0.000100186	75.4147	77.3417	0.1511		0.466531
P07384	0.000850822	7.32443e-05	5.17928e-05	0.000109962	0.000291721	0.000198956	0.000129882	0.000179602	6.59079e-05	0.000221786	6	0.000275508	0.000159227	0.000109962	0.000179602	121.69	39.0656	1.0001		1.63331
P15104	7.21772e-05	0.000177988	0.000201277	0.000315257	0.000614745	0.00013005	9.8749e-05	0.000158659	0.000124069	0.000116506	7	0.000276289	0.000125607	0.000201277	0.000124069	75.2762	17.4368	0.1511		0.616407
Q9UJ70	0.000229086	0.000329312	0.000271912	0.000375917	0.00121998	0.000265466	0.000287153	0.000200846	7.13388e-05	0.000379351	8	0.000485241	0.000240831	0.000329312	0.000265466	85.4206	47.4647	0.3101		0.806123
Q14624	2.3601e-05	5.18799e-05	8.56945e-05	2.98588e-05	2.14586e-05	0.000103543	3.50174e-05	0.000213897	5.13859e-05	0.000157234	5	4.24986e-05	0.000112215	2.98588e-05	0.000103543	63.5039	66.2402	0.0951		3.46775
Q9NQR4	0.000486337	3.72435e-05	0.000456356	9.84328e-05	0.000352657	0.000116432	0.000187866	0.000168195	6.02762e-05	0.000121376	6	0.000286205	0.000130829	0.000352657	0.000121376	72.1703	38.072	0.5481		0.344175
P40926	0.000133228	0.000203175	0.000261507	0.00069073	0.00111729	0.000302051	0.000234824	0.000169988	0.000218975	0.000131139	7	0.000481186	0.000211396	0.000261507	0.000218975	86.6362	30.8212	0.4211		0.83736
P69905	0.000210439	0.000215111	0.000150795	0.000172387	0.000127265	0.00596077	0.000305597	0.00158622	0.000174339	0.00459232	9	0.000175199	0.00252385	0.000172387	0.00158622	21.6143	103.721	0.0321		9.20154
P13716	0.000354294	0.000620493	0.000575705	0.000261824	0.000755535	0.000239388	0.000259219	0.000305156	8.17693e-05	0.000255458	8	0.00051357	0.000228198	0.000575705	0.000255458	39.2564	37.4376	0.0161	-2.25362	0.443731
P37802	0.000150032	7.1939e-05	0.000170548	0.000321766	0.000906029	0.000106668	0.0002356	0.000126051	0.000220553	0.00044828	8	0.000324063	0.00022743	0.000170548	0.000220553	104.202	59.7039	1.0001		1.29321
Q15782	0.00022681	0.000187216	5.70035e-05	0.000170197	0.000155134	0.00013406	0.000320915	0.000265787	0.000169584	8.73335e-05	4	0.000159272	0.000195536	0.000170197	0.000169584	39.6316	49.0636	0.8411		0.996401
P01859	6.78718e-05	0.000283281	0.000836016	0.0013325	0.00104266	0.00288656	0.000639581	0.00158848	0.000548369	0.00250193	4	0.000712467	0.00163298	0.000836016	0.00158848	73.8859	64.8927	0.2221		1.90006
P23141	6.14129e-05	0.00024395	0.000188488	0.000120569	0.000751957	0.00010908	0.000116495	0.000122278	0.000118656	0.000130486	9	0.000273275	0.000119399	0.000188488	0.000118656	101.111	6.57726	0.3101		0.629514
P04792	5.34534e-05	0.000555029	0.000268449	0.000270046	0.000784935	4.69048e-05	8.49844e-05	0.000148595	0.000457661	0.000108385	6	0.000386383	0.000169306	0.000270046	0.000108385	73.8371	97.6718	0.2221		0.401358
O00299	9.10392e-05	0.000128543	0.000439235	0.000640427	0.0014414	0.000350064	0.000237575	0.000332698	0.000239963	0.000782953	9	0.000548129	0.000388651	0.000439235	0.000332698	100.063	58.2525	1.0001		0.75745
P19827	0.000188198	0.00024117	8.35234e-05	6.16866e-05	4.45162e-05	0.000244668	4.66911e-05	0.000220307	8.79236e-05	0.000151413	4	0.000123819	0.0001502	8.35234e-05	0.000151413	69.5794	56.1319	0.5481		1.81282
P23528	0.000514213	0.000203178	0.000666872	0.000920814	0.00148369	0.000508754	0.000935486	0.000476567	0.000711009	0.00112678	7	0.000757753	0.00075172	0.000666872	0.000711009	63.5885	37.0838	1.0001		1.06618
Q9NZ08	5.54935e-05	0.000654933	0.00015522	7.10059e-05	0.000158705	0.000143518	0.00040635	0.000470523	3.47452e-05	0.000240905	3	0.000219071	0.000259208	0.00015522	0.000240905	113.288	69.6583	0.8411		1.55203
P78417	5.54213e-05	0.00011838	0.000336301	0.00034847	0.000908707	0.000336527	0.000364654	0.000302361	0.000180008	0.000615467	7	0.000353456	0.000359804	0.000336301	0.000336527	95.1796	44.2848	0.6901		1.00067
P06870	0.005318	0.00144235	0.00222882	0.00182153	0.00166903	0.00142984	0.00160386	0.000731302	0.00112722	0.00115554	7	0.00249595	0.00120955	0.00182153	0.00115554	64.2417	27.4956	0.0161	-1.57634	0.63438
P08246	0.000117384	0.00034485	0.000275778	0.000129481	0.000143092	0.00607106	8.37676e-05	0.00114787	0.00030442	0.00214638	10	0.000202117	0.0019507	0.000143092	0.00114787	50.5399	125.192	0.2221		8.02191
P40121	0.000125149	0.000112156	0.000195556	0.000331663	0.000493305	0.000320154	0.000246628	0.00035947	0.000111047	0.000491363	9	0.000251566	0.000305732	0.000195556	0.000320154	63.9136	45.9521	0.8411		1.63715
Q9H4A4	9.3937e-05	0.000380614	9.26725e-05	0.00028488	0.000400984	0.000136321	0.00013772	0.000126523	9.09571e-05	0.000253744	4	0.000250617	0.000149053	0.00028488	0.000136321	59.9115	41.2665	0.4211		0.478522
P41218	6.20006e-05	4.2429e-05	7.90672e-05	1.76629e-05	3.85326e-05	0.000228204	0.00010146	0.00017655	4.42947e-05	0.000217068	5	4.79385e-05	0.000153515	4.2429e-05	0.00017655	48.9454	51.2777	0.0321		4.16107
Q99536	0.000684581	0.000173166	0.000174284	0.000126692	0.000206803	0.000431497	0.000743491	0.00040861	0.000355257	0.000458323	6	0.000273105	0.000479436	0.000174284	0.000431497	84.8705	31.7878	0.0951		2.47583
P01008	0.000115735	0.000235165	0.000200744	0.000442864	0.000262777	0.000318683	0.000125369	0.000312488	0.000166373	0.000331903	8	0.000251457	0.000250963	0.000235165	0.000312488	47.8965	38.7618	0.8411		1.3288
P52907	7.6186e-05	0.000109573	0.000266029	0.000261399	0.000470652	0.00023275	0.000250372	0.000119691	0.000104134	0.00050462	8	0.000236768	0.000242313	0.000261399	0.00023275	66.1528	66.2526	1.0001		0.890402
P40394	0.00056382	0.000145421	0.000811462	0.000891306	0.000986655	0.000209435	0.000206037	0.000554774	0.031503	0.000183839	9	0.000679733	0.00653142	0.000811462	0.000209435	49.631	213.742	0.5481		0.258096
P02749	2.64998e-05	2.63473e-05	5.03817e-05	1.07788e-05	2.07331e-05	0.000119187	4.09063e-05	0.000121714	5.73079e-05	0.000114955	3	2.69481e-05	9.08138e-05	2.63473e-05	0.000114955	54.0869	42.4909	0.0161		4.36305
P07195	0.000107921	0.000228389	0.000216567	0.000380751	0.000931102	0.000334273	0.000199445	0.000262957	0.000249654	0.000594554	7	0.000372946	0.000328177	0.000228389	0.000262957	87.6262	47.6917	0.8411		1.15136
P61160	4.37978e-05	7.86119e-05	0.000131144	0.000222591	0.00061126	0.000197469	0.000107821	0.000331615	9.15607e-05	0.000817215	5	0.000217481	0.000309136	0.000131144	0.000197469	105.855	96.9078	0.5481		1.50574
P02533	1.48268e-05	8.89344e-06	8.64488e-06	1.30096e-05	7.37603e-06	1.1909e-05	1.14236e-05	1.18871e-05	2.77246e-05	7.67699e-06	1	1.05501e-05	1.41242e-05	8.89344e-06	1.18871e-05	30.2677	55.2675	0.6901		1.33661
P20160	0.000269504	0.000352821	0.000710973	0.000136122	0.000236376	0.00527439	0.000819871	0.000358344	0.000180443	0.000899206	10	0.000341159	0.00150645	0.000269504	0.000819871	64.7274	141.261	0.1511		3.04214
P60900	9.07482e-05	3.71749e-05	0.000131997	8.73939e-05	0.000303093	0.000128559	0.000202439	0.000184603	8.87264e-05	0.000178231	5	0.000130081	0.000156512	9.07482e-05	0.000178231	78.7148	29.877	0.4211		1.96402
P30043	4.11339e-05	0.000101747	0.000125477	7.34482e-05	0.000611154	5.21196e-05	6.62405e-05	4.25045e-05	4.11881e-05	0.000119111	4	0.000190592	6.42327e-05	0.000101747	5.21196e-05	124.457	50.2399	0.3101		0.512246
P13489	0.000118114	0.000169157	0.000447255	0.000889463	0.000990006	0.000109774	0.000188009	0.000199917	0.00032951	0.000244348	10	0.000522799	0.000214312	0.000447255	0.000199917	76.9442	37.6193	0.4211		0.446987
P55072	2.90418e-05	0.000127357	4.55852e-05	7.41682e-05	0.00039196	0.000124993	2.65796e-05	0.000192941	8.79454e-05	0.000189869	6	0.000133622	0.000124466	7.41682e-05	0.000124993	111.631	56.6438	0.8411		1.68526
P04217	0.000195927	0.000162885	0.000271649	9.81205e-05	0.000172811	0.000596334	0.000339386	0.000586678	0.00026151	0.000594154	5	0.000180278	0.000475612	0.000172811	0.000586678	34.7535	34.1233	0.0161		3.39492
Q8WXI7	0.000100422	5.71074e-05	0.000107293	0.000287099	0.000103913	0.000258054	0.000201494	2.90196e-05	0.000126223	8.37579e-05	3	0.000131167	0.00013971	0.000103913	0.000126223	68.2514	65.3936	1.0001		1.2147
Q99497	6.35818e-05	5.42848e-05	9.0634e-05	0.000172532	0.000320235	7.764e-05	0.000143314	6.88898e-05	6.75288e-05	0.000131108	5	0.000140254	9.76959e-05	9.0634e-05	7.764e-05	79.0481	37.3972	1.0001		0.856632
O75874	0.000164463	0.000204455	0.000489735	0.000703906	0.00147274	0.000108298	0.000310813	0.000192853	0.000166506	0.000255497	7	0.00060706	0.000206793	0.000489735	0.000192853	87.5748	38.0081	0.2221		0.393791
P49189	7.44387e-05	0.000200936	0.000402745	0.000894193	0.00166536	0.000144382	0.00029236	0.000115066	9.96788e-05	0.000137636	8	0.000647533	0.000157824	0.000402745	0.000137636	100.221	48.9745	0.2221		0.341745
P02753	5.73366e-05	4.56649e-05	2.68489e-05	3.3917e-05	1.38685e-05	0.000133855	5.85161e-05	0.000100593	8.63408e-06	6.26851e-05	2	3.55272e-05	7.28567e-05	3.3917e-05	6.26851e-05	47.2137	64.8299	0.1511		1.84819
P08238	2.85245e-05	9.09962e-05	6.33678e-05	0.000122935	0.000360903	0.00016003	6.37147e-05	0.000320205	0.000133369	0.000167184	5	0.000133345	0.0001689	9.09962e-05	0.00016003	98.9006	55.6203	0.3101		1.75864
P51149	7.81311e-05	0.000495337	0.000355902	0.000103797	0.000454169	0.000213961	0.000194829	0.000400896	0.000110304	0.000326665	6	0.000297467	0.000249331	0.000355902	0.000213961	65.691	45.9498	0.8411		0.601178
P31146	3.6461e-05	3.68483e-05	0.000117303	0.00010572	9.30813e-05	0.000108754	6.67735e-05	0.000257742	3.29539e-05	0.00107304	5	7.78828e-05	0.000307852	9.30813e-05	0.000108754	49.5602	141.716	0.5481		1.16838
P02766	0.000251502	4.34941e-05	0.000167273	0.000100674	5.53676e-05	0.000363905	0.000240471	0.000256089	0.000152093	0.000244353	5	0.000123662	0.000251382	0.000100674	0.000244353	69.8731	29.9741	0.0951		2.42717
Q6ZVX7	0.00032468	0.000192539	0.000249866	0.000362673	0.00158628	8.3013e-05	0.000120545	0.00011565	0.000110858	0.000243106	7	0.000543207	0.000134634	0.00032468	0.00011565	108.026	46.318	0.0161	-2.80743	0.356197
P22392	0.000251967	0.000246112	0.000186748	0.000222086	0.000855061	0.000314178	0.000137941	0.000289065	0.000190718	9.6386e-05	4	0.000352395	0.000205658	0.000246112	0.000190718	80.0715	45.7965	0.5481		0.774925
Q15181	0.0001828	0.000130539	0.000129566	0.000256694	0.000316194	0.000132866	0.000176733	0.000107248	0.000135649	0.00015263	6	0.000203159	0.000141025	0.0001828	0.000135649	40.2505	18.2379	0.4211		0.74206
O95336	7.63257e-05	8.88444e-05	0.000148957	0.000270624	0.000691857	8.38014e-05	0.000124384	0.000117793	5.84564e-05	0.00017702	5	0.000255322	0.000112291	0.000148957	0.000117793	100.212	40.0155	0.4211		0.790785
P36871	4.31744e-05	0.00165364	0.000176045	0.000172203	0.000378418	0.000169442	0.000201873	0.000305717	0.000276185	0.000377229	6	0.000484696	0.000266089	0.000176045	0.000276185	137.071	31.1544	1.0001		1.56883
P52565	6.92987e-05	0.000151714	0.000264364	0.000224543	0.000833549	0.000208945	0.000274026	0.000167522	0.000117058	0.000308576	3	0.000308694	0.000215226	0.000224543	0.000208945	98.0534	36.0826	1.0001		0.930535
P62805	4.19704e-05	0.000140098	9.52549e-05	9.41709e-05	5.85828e-05	0.0128103	9.98056e-05	0.00105951	0.000113665	0.00102257	6	8.60153e-05	0.00302117	9.41709e-05	0.00102257	44.1524	181.791	0.0321		10.8586
P29373	0.000207312	0.000243476	0.000137793	0.000117995	0.000426043	0.000120547	0.000136863	0.000288088	0.000169467	0.000235784	4	0.000226524	0.00019015	0.000207312	0.000169467	54.1191	36.9876	0.8411		0.817451
O00391	3.71627e-06	1.46404e-06	6.76521e-06	1.54528e-05	1.13158e-05	2.56407e-06	1.61008e-05	4.0938e-06	5.16485e-05	1.78346e-05	1	7.74284e-06	1.84484e-05	6.76521e-06	1.61008e-05	73.2879	107.27	0.3101		2.37994
P06702	0.000359897	4.19033e-05	0.000195	0.000133333	0.000304105	0.000346117	0.00023262	0.000943831	0.000220473	0.00221948	6	0.000206848	0.000792504	0.000195	0.000346117	61.9278	107.424	0.1511		1.77496
P07437	9.4444e-05	0.000100949	4.97721e-05	6.11767e-05	0.000112958	4.28065e-05	0.000104405	7.85666e-05	0.000143248	0.000133561	5	8.38601e-05	0.000100517	9.4444e-05	0.000104405	32.2588	40.8535	0.5481		1.10547
O75223	7.94888e-05	6.998e-05	0.000129109	0.000218337	0.000508637	7.21618e-05	0.000180068	0.000171828	5.89765e-05	0.000130288	6	0.00020111	0.000122664	0.000129109	0.000130288	90.3419	45.3482	0.6901		1.00913
P30044	0.000199246	0.000372459	0.000378074	0.000231309	0.000574686	0.000412743	0.000271181	0.000160277	0.000320415	0.00020024	5	0.000351155	0.000272971	0.000372459	0.000271181	42.3788	36.5331	0.5481		0.728081
P01591	0.00770532	0.00189183	0.0062917	0.00585301	0.00311316	0.00613504	0.013225	0.00255154	0.00880162	0.00371815	6	0.004971	0.00688627	0.00585301	0.00613504	48.1662	62.1382	0.5481		1.04819
Q14CN2	2.24743e-05	1.94711e-05	7.55687e-05	0.000103427	0.000230127	5.67008e-05	9.32287e-05	7.88006e-05	0.000197703	5.66309e-05	6	9.02137e-05	9.66128e-05	7.55687e-05	7.88006e-05	95.2874	60.6625	0.8411		1.04277
P52566	3.26084e-05	0.000204455	0.000300696	0.000273628	0.000681045	0.000608983	0.00035449	0.000528137	0.000153924	0.00153677	5	0.000298486	0.00063646	0.000273628	0.000528137	79.7234	83.7088	0.3101		1.93013
Q9BRF8	6.63327e-05	4.57008e-05	0.000161357	0.00014947	0.000368246	0.000138147	0.000106005	5.37085e-05	0.00012636	0.000165766	5	0.000158221	0.000117997	0.00014947	0.00012636	80.7542	35.5402	0.8411		0.84539
P62826	9.05456e-05	0.000115225	0.000204633	0.00039075	0.00100696	5.2536e-05	0.000269528	7.99649e-05	0.000150106	0.000382656	5	0.000361624	0.000186958	0.000204633	0.000150106	104.95	73.7234	0.4211		0.733535
P00915	1.68243e-05	4.81619e-05	1.30069e-05	9.91133e-05	5.2518e-05	0.000294265	8.80585e-05	6.93472e-05	1.47546e-05	0.000199672	3	4.59249e-05	0.00013322	4.81619e-05	8.80585e-05	75.492	84.3467	0.2221		1.82839
O14818	2.25633e-05	3.70006e-05	0.000115261	0.000218412	0.000475983	0.000156121	0.000120332	0.000110566	8.80077e-05	0.000333572	5	0.000173844	0.00016172	0.000115261	0.000120332	106.967	61.3135	0.8411		1.044
P07738	6.92249e-05	2.9564e-05	0.000544181	0.000109758	0.000262107	8.10916e-05	9.55761e-05	2.55396e-05	2.93134e-05	3.51181e-05	3	0.000202967	5.33278e-05	0.000109758	3.51181e-05	103.514	61.0246	0.1511		0.319959
Q6XQN6	2.82932e-05	5.55841e-05	0.000134433	0.000286288	0.000485281	3.54286e-05	0.000118218	0.000102284	8.80828e-05	0.000192616	5	0.000197976	0.000107326	0.000134433	0.000102284	95.6547	53.0316	0.6901		0.760858
P02671	3.23331e-05	1.96484e-05	1.58134e-05	1.09909e-05	7.11603e-05	0.00011394	4.14213e-05	2.43512e-05	2.24909e-05	0.000132474	2	2.99892e-05	6.69354e-05	1.96484e-05	4.14213e-05	81.1561	78.1466	0.1511		2.10812
Q5VTE0	5.55594e-05	0.000189065	0.000243638	0.000195852	0.000630555	4.84545e-05	0.000224519	0.000171747	0.000487479	0.00046109	6	0.000262934	0.000278658	0.000195852	0.000224519	82.557	68.1467	1.0001		1.14637
P61586	0.000124424	5.83054e-05	0.000173446	0.000134147	0.000645207	5.99291e-05	0.000138508	0.000183379	7.40283e-05	0.000653252	6	0.000227106	0.000221819	0.000134147	0.000138508	104.517	111.025	0.8411		1.0325
Q04760	0.000274401	0.000340438	0.000200238	0.000232728	0.000617495	0.000100536	0.000273244	8.71027e-05	8.92253e-05	0.000144429	5	0.00033306	0.000138907	0.000274401	0.000100536	50.2647	56.5723	0.0321	-2.72938	0.366383
P04080	0.000303026	0.000364755	0.00143292	0.00107955	0.00382563	0.000354363	0.000722287	0.000235412	0.00027669	0.000262303	4	0.00140118	0.000370211	0.00107955	0.00027669	102.573	54.4889	0.0561		0.2563
P00505	0.000180692	0.000121743	9.51772e-05	0.000261619	0.000345361	7.11204e-05	0.000100326	0.000115705	0.000108913	0.00302384	6	0.000200919	0.000683981	0.000180692	0.000108913	51.2471	191.253	0.4211		0.602755
P14314	8.96492e-05	8.78514e-05	3.80814e-05	5.70895e-05	0.000154905	8.58014e-05	6.749e-05	0.000110097	4.07544e-05	7.94238e-05	5	8.55154e-05	7.67133e-05	8.78514e-05	7.94238e-05	51.9537	33.1223	0.8411		0.90407
P07602	2.2942e-05	0.000194674	0.000696239	0.000677717	6.93515e-05	2.35945e-05	0.00196148	9.38078e-05	0.000350165	0.000127425	5	0.000332185	0.000511294	0.000194674	0.000127425	99.3366	160.344	1.0001		0.654557
P07355	4.82516e-05	4.78771e-05	8.07987e-05	7.29098e-05	0.000117475	0.0001454	7.28671e-05	8.52969e-05	7.52111e-05	4.33421e-05	4	7.34625e-05	8.44233e-05	7.29098e-05	7.52111e-05	38.9885	44.4188	0.8411		1.03156
P24158	9.23581e-05	0.000356989	0.000281501	0.000217037	0.000378368	0.00426899	0.000350271	0.00267148	0.000215527	0.00637007	7	0.000265251	0.00277527	0.000281501	0.00267148	43.6785	94.6455	0.2221		9.49011
O60235	7.59705e-05	0.000107164	9.237e-05	0.000218202	0.000105524	0.000152147	0.000285492	0.000143317	0.00022005	0.000208011	4	0.000119846	0.000201803	0.000105524	0.000208011	47.053	28.5325	0.0561		1.97121
P80303	6.55339e-05	0.000160554	3.6343e-05	0.000111759	5.33639e-05	4.75323e-05	2.06463e-05	0.000127752	0.000200306	0.000139844	3	8.55106e-05	0.000107216	6.55339e-05	0.000127752	58.9683	67.9149	0.8411		1.9494
P29218	1.45422e-05	2.38047e-05	3.81524e-05	5.70084e-05	0.000153671	9.43381e-06	2.86087e-05	1.16873e-05	2.80696e-05	2.67965e-05	2	5.74356e-05	2.09192e-05	3.81524e-05	2.67965e-05	97.7336	45.472	0.2221		0.702354
P59998	0.000438602	4.82837e-05	0.000244148	0.000177486	0.000397626	0.000149242	0.000502869	0.000484256	0.000166129	0.000908998	5	0.000261229	0.000442299	0.000244148	0.000484256	61.3432	70.1785	0.4211		1.98345
P12429	3.94933e-05	5.90271e-05	5.01224e-05	1.11136e-05	4.25277e-05	0.000116326	4.66165e-05	2.84149e-05	3.07509e-05	0.00021313	4	4.04568e-05	8.70476e-05	4.25277e-05	4.66165e-05	44.6379	90.8127	0.6901		1.09614
P68363	3.3341e-05	8.28698e-05	4.22769e-05	0.000140542	0.000187568	2.85616e-05	5.16095e-05	0.000133963	0.000240908	0.000121505	4	9.73195e-05	0.000115309	8.28698e-05	0.000121505	67.6632	72.2256	1.0001		1.46622
P02763	8.85296e-05	0.000175164	0.000155505	9.4779e-05	0.000141874	0.000333427	0.000228341	0.00116823	0.000343193	0.000843439	4	0.00013117	0.000583327	0.000141874	0.000343193	28.9919	69.4189	0.0081		2.419
P01040	0.0011595	0.000800598	0.00294601	0.00243029	0.00546451	0.00107828	0.00127709	0.000905057	0.000746477	0.000588712	5	0.00256018	0.000919123	0.00243029	0.000905057	72.1783	29.4286	0.0951		0.372407
P10909	5.04419e-05	0.000175602	7.33119e-05	0.000241256	0.000151278	0.000787273	0.000122712	0.000378738	0.00156437	0.00023465	6	0.000138378	0.000617549	0.000151278	0.000378738	56.0959	94.8984	0.0951		2.50358
Q96BQ1	4.45897e-05	5.85773e-05	5.58336e-05	9.43406e-05	5.83142e-05	1.10503e-05	7.12812e-05	7.56035e-05	6.16316e-05	5.65106e-05	3	6.23311e-05	5.52154e-05	5.83142e-05	6.16316e-05	30.1407	46.7667	0.8411		1.05689
P31946	2.554e-05	1.24387e-05	5.46741e-05	0.000135886	0.000377497	0.000145567	4.90818e-05	0.00011046	3.25304e-05	0.000221423	2	0.000121207	0.000111813	5.46741e-05	0.00011046	124.652	68.3705	0.6901		2.02034
P05155	1.99383e-05	0.000109943	3.39135e-05	7.0949e-05	2.43335e-05	0.000223222	1.94838e-05	0.000268045	0.000140013	0.000310973	3	5.18155e-05	0.000192347	3.39135e-05	0.000223222	73.7223	60.0561	0.1511		6.5821
P17213	1.37814e-06	4.58569e-06	2.77272e-06	6.49244e-07	2.31554e-06	4.94258e-05	3.20852e-06	3.471e-05	1.7185e-06	3.95053e-05	1	2.34027e-06	2.57136e-05	2.31554e-06	3.471e-05	64.1479	85.1071	0.0951		14.99
P07339	0.000222535	0.000308197	0.000130086	0.000180419	0.000174867	0.000230104	0.000302357	0.00035839	0.00057089	0.000350719	5	0.000203221	0.000362492	0.000180419	0.000350719	33.0695	35.0927	0.0321		1.94391
Q9UKK9	2.05249e-05	2.8855e-05	2.99266e-05	6.39772e-05	0.000197299	4.18578e-05	2.9351e-05	2.61725e-05	2.90604e-05	5.07305e-05	4	6.81164e-05	3.54344e-05	2.99266e-05	2.9351e-05	108.801	29.5531	0.8411		0.980766
P00492	6.92008e-06	1.26446e-05	3.19975e-05	4.38652e-05	8.26479e-05	3.35337e-05	4.73069e-05	3.88377e-05	1.1813e-05	0.00020448	2	3.56151e-05	6.71942e-05	3.19975e-05	3.88377e-05	84.7505	115.869	0.5481		1.21377
P12830	8.87813e-05	5.10272e-05	0.000134781	0.000205374	0.000316175	7.68796e-05	0.000191609	0.000104971	7.76963e-05	9.24267e-05	5	0.000159228	0.000108716	0.000134781	9.24267e-05	65.8907	43.9363	0.5481		0.685756
P67775	6.60181e-06	2.07416e-05	9.35511e-06	3.55506e-05	8.22515e-05	5.06613e-06	0.000109677	1.96992e-05	5.92479e-05	2.41014e-05	1	3.09001e-05	4.35583e-05	2.07416e-05	2.41014e-05	99.9621	96.363	0.8411		1.16198
P20618	0.000213666	7.77225e-05	8.46507e-05	9.31154e-05	0.000294697	0.00013269	0.000138143	0.000177942	7.26597e-05	0.000258036	5	0.00015277	0.000155894	9.31154e-05	0.000138143	63.5334	43.86	1.0001		1.48357
O95865	2.35035e-05	1.30121e-05	3.09109e-05	4.49459e-06	1.94372e-05	1.26892e-05	7.97979e-06	7.04229e-06	3.34453e-06	1.09268e-05	1	1.82717e-05	8.39652e-06	1.94372e-05	7.97979e-06	55.1353	43.0892	0.0951		0.410542
P58499	0.000125271	5.98191e-05	0.000129871	8.73014e-05	9.11641e-05	0.000116101	6.76191e-05	0.000117776	0.000119295	0.000137924	5	9.86853e-05	0.000111743	9.11641e-05	0.000117776	29.4391	23.4426	0.6901		1.29191
Q6UX06	0.000255967	0.000151084	0.000105959	0.000125515	7.47395e-05	0.000636429	0.000441686	0.00026571	0.000143863	0.000762787	5	0.000142653	0.000450095	0.000125515	0.000441686	48.5207	56.6812	0.0321		3.519
P53004	2.91471e-05	3.38813e-05	8.22885e-05	0.00014037	0.000555576	2.16598e-05	0.000104302	3.83048e-05	7.58354e-05	4.14177e-05	5	0.000168253	5.63039e-05	8.22885e-05	4.14177e-05	131.427	59.1133	0.5481		0.503323
P48637	4.70624e-05	7.25474e-05	0.000126979	0.000185065	0.000387574	5.3442e-05	0.000128818	6.44782e-05	6.17662e-05	8.85826e-05	5	0.000163845	7.94174e-05	0.000126979	6.44782e-05	82.9228	38.4712	0.4211		0.507787
P28066	6.43642e-05	4.64466e-05	6.36088e-05	0.000104509	0.000176018	7.98842e-05	3.9153e-05	0.000102923	7.10937e-05	0.000107003	4	9.09893e-05	8.00113e-05	6.43642e-05	7.98842e-05	57.2533	34.2416	1.0001		1.24113
Q14019	0.000502018	0.000202593	0.000226682	6.33093e-05	0.000231133	0.000522787	0.000446469	0.000251715	0.000331011	0.000600561	6	0.000245147	0.000430509	0.000226682	0.000446469	64.9462	32.7583	0.0561		1.96958
P36955	0.000223835	2.71694e-05	5.81374e-05	4.19208e-05	6.87999e-05	0.000123081	3.32862e-05	6.45658e-05	0.000269091	0.000119905	4	8.39725e-05	0.000121986	5.81374e-05	0.000119905	94.9974	74.2444	0.4211		2.06244
P63000	1.59634e-05	1.92252e-05	6.18535e-05	4.2454e-05	0.000248348	2.18772e-05	2.95814e-05	3.12819e-05	1.81832e-05	8.86405e-05	3	7.75689e-05	3.79128e-05	4.2454e-05	2.95814e-05	125.397	76.1388	0.8411		0.696786
P05089	1.8734e-05	3.74048e-05	0.000103917	2.93556e-05	0.000102441	0.000138674	4.3004e-05	0.000210032	1.42813e-05	0.000347525	3	5.83706e-05	0.000150703	3.74048e-05	0.000138674	70.9954	89.4038	0.3101		3.70739
P13667	5.94251e-06	1.53113e-06	3.86327e-06	1.06359e-05	4.23589e-05	1.27756e-05	3.02464e-06	1.95906e-05	1.93834e-05	1.92146e-05	2	1.28663e-05	1.47978e-05	5.94251e-06	1.92146e-05	130.764	48.5201	0.4211		3.23341
Q09666	2.0374e-05	1.23855e-05	1.66408e-06	1.22489e-05	1.46122e-05	3.49616e-06	1.54014e-05	3.62637e-06	2.12078e-05	6.28624e-06	1	1.22569e-05	1.00036e-05	1.23855e-05	6.28624e-06	55.2833	79.2661	1.0001		0.507547
P59665	8.14396e-05	8.61662e-05	0.000166193	6.04163e-05	8.91888e-05	0.00128971	0.000109723	0.000689595	0.000149575	0.00358833	3	9.66807e-05	0.00116539	8.61662e-05	0.000689595	41.8425	123.298	0.0321		8.00307
Q12792	2.06929e-05	3.45578e-05	2.44557e-05	7.32169e-05	0.000112383	0.000160556	0.000266173	3.21633e-05	0.00017115	0.000171725	3	5.30613e-05	0.000160354	3.45578e-05	0.00017115	73.7994	52.0607	0.0561		4.95258
P20810	1.09198e-05	1.51653e-05	1.30811e-05	3.03014e-05	4.23214e-05	6.55187e-06	3.25694e-05	1.68945e-05	9.54857e-06	2.8616e-05	3	2.23578e-05	1.88361e-05	1.51653e-05	1.68945e-05	60.434	60.8323	0.6901		1.11403
Q15907	1.93729e-05	7.21885e-05	7.2202e-05	8.3966e-05	0.000149858	0.000245209	0.000110964	0.000115191	7.06989e-05	0.000355058	4	7.95175e-05	0.000179424	7.2202e-05	0.000115191	58.6235	65.8324	0.2221		1.5954
Q9UBC9	0.000226319	0.00012498	0.000488748	0.000643501	0.00446908	9.00589e-05	0.000375583	0.000114208	0.000231863	0.000201294	7	0.00119053	0.000202601	0.000488748	0.000201294	154.915	55.8748	0.1511		0.411856
P36222	2.60068e-05	2.51626e-05	4.24292e-05	1.45949e-05	2.49834e-05	9.67577e-05	3.86476e-05	0.000103074	6.10516e-05	0.000105096	4	2.66354e-05	8.09252e-05	2.51626e-05	9.67577e-05	37.5305	36.5934	0.0161		3.8453
Q9Y5Z4	0.000235576	0.000197384	0.000280974	0.000260622	0.000615899	0.000140506	0.000259317	0.000126963	8.23463e-05	0.000109719	6	0.000318091	0.00014377	0.000260622	0.000126963	53.2467	47.4006	0.0321	-2.05274	0.487153
Q9UHA7	4.33629e-05	5.81869e-05	1.98807e-05	0.000282432	0.00061554	4.36281e-05	0.000148697	9.2616e-05	0.000165399	0.000108796	3	0.00020388	0.000111827	5.81869e-05	0.000108796	124.2	43.0227	0.8411		1.86977
O15143	5.80621e-06	4.22542e-06	2.3386e-05	3.02225e-05	1.04454e-05	4.49705e-05	1.16113e-05	7.53086e-05	1.42773e-05	0.000247723	2	1.48171e-05	7.87782e-05	1.04454e-05	4.49705e-05	77.1895	124.324	0.0951		4.30528
A0A0B4J1Y9	0.00030457	2.6479e-05	6.1709e-05	0.000115635	4.98363e-05	3.30332e-05	0.000118658	6.59935e-05	8.8992e-05	0.000103215	2	0.000111646	8.19784e-05	6.1709e-05	8.8992e-05	100.942	40.8996	0.8411		1.44212
O95834	0.000233423	0.0001059	8.33578e-05	0.000184927	0.000369924	5.45493e-05	6.06621e-05	0.000665641	5.54925e-05	6.73631e-05	5	0.000195506	0.000180742	0.000184927	6.06621e-05	58.6421	150.001	0.1511		0.328033
P49913	1.69953e-05	4.78821e-05	7.27374e-05	2.21345e-05	3.91021e-05	0.000758084	6.95787e-05	0.000131077	3.14497e-05	0.000393064	4	3.97703e-05	0.000276651	3.91021e-05	0.000131077	55.9823	109.865	0.0951		3.35217
P55058	3.77163e-05	0.000114943	0.000102941	0.000103101	3.92193e-05	0.000197952	0.000106796	0.000436108	0.000550933	0.000383398	5	7.95842e-05	0.000335037	0.000102941	0.000383398	47.5622	53.8189	0.0161		3.72443
O43852	0.000111314	8.72058e-05	4.3174e-05	4.81146e-05	4.46253e-05	3.13487e-05	0.000564755	4.9215e-05	4.808e-05	9.94609e-05	2	6.68867e-05	0.000158572	4.81146e-05	4.9215e-05	46.0622	144.093	0.8411		1.02287
P31025	0.000196799	7.07423e-05	0.000186297	0.000311945	8.59802e-05	0.00112102	0.000138597	0.000596992	0.00328868	0.00206018	7	0.000170353	0.00144109	0.000186297	0.00112102	57.2477	87.1433	0.0561		6.01735
P01033	0.000262362	0.000185545	0.000351966	0.000248027	0.000216985	0.00020068	0.000385902	0.000298029	0.000592765	0.000137323	3	0.000252977	0.00032294	0.000248027	0.000298029	24.8075	55.1307	0.6901		1.2016
P61019	3.30865e-05	0.000138706	1.23119e-05	4.70591e-05	2.19936e-05	0.000136958	0.000119539	1.83301e-05	3.31639e-05	6.4874e-05	2	5.06314e-05	7.45729e-05	3.30865e-05	6.4874e-05	100.545	69.9551	0.5481		1.96074
P01042	1.27096e-05	3.18337e-05	6.46816e-05	3.99648e-05	3.68934e-05	8.30903e-05	2.78717e-05	0.000132124	8.54068e-05	0.000122046	3	3.72166e-05	9.01076e-05	3.68934e-05	8.54068e-05	50.1167	45.5216	0.0951		2.31496
O43278	6.50902e-05	3.14593e-05	0.000107076	0.000114303	0.000270952	0.000163052	0.000119653	7.64625e-05	8.88493e-05	9.81476e-05	5	0.000117776	0.000109233	0.000107076	9.81476e-05	78.0679	31.1039	0.8411		0.91662
O43488	1.48684e-05	2.0879e-05	6.942e-05	4.75342e-05	0.000115525	1.34942e-05	1.8663e-05	2.10412e-05	1.15474e-05	2.04869e-05	2	5.36453e-05	1.70465e-05	4.75342e-05	1.8663e-05	76.2488	25.1064	0.0951		0.392622
P22894	0.000102029	0.000115109	7.48499e-05	0.00013059	0.00012266	0.000376586	0.00024652	0.000271	9.73174e-05	0.000484102	4	0.000109048	0.000295105	0.000115109	0.000271	20.0118	49.2286	0.0951		2.35428
P25789	0.000237501	0.000104605	8.5182e-05	0.000196352	0.000437682	0.000645603	0.000805787	0.000102675	0.000229161	0.000226149	5	0.000212264	0.000401875	0.000196352	0.000229161	66.393	75.9634	0.4211		1.1671
O60701	2.76007e-05	0.000192846	0.000119278	0.000249889	0.000432017	4.61198e-05	0.000109349	0.000132163	9.52086e-05	0.000122803	6	0.000204326	0.000101129	0.000192846	0.000109349	74.431	33.3925	0.3101		0.567025
Q9UBX7	9.71826e-05	0.000344865	0.000378975	0.000505319	0.000830221	8.62852e-05	8.55488e-05	0.000282987	0.000351866	0.000300645	6	0.000431313	0.000221466	0.000378975	0.000282987	62.0455	57.0285	0.0951		0.746718
Q99880	0.000110604	4.71795e-05	2.56647e-05	6.82214e-06	1.67146e-05	0.00120005	5.18838e-05	0.000132139	0.000103108	0.000125295	2	4.13971e-05	0.000322496	2.56647e-05	0.000125295	100.148	152.429	0.0321		4.88198
Q9BQR3	0.000552436	0.000153807	0.000851504	0.000344077	0.000999048	0.000248726	0.000569764	0.000129109	0.000278769	8.66284e-05	5	0.000580174	0.000262599	0.000552436	0.000248726	60.1649	72.1502	0.1511		0.450235
Q13162	2.49495e-05	1.15682e-05	2.5367e-05	2.01539e-05	5.84996e-06	3.97013e-05	3.62425e-05	5.0315e-05	2.73693e-05	4.14299e-05	1	1.75777e-05	3.90116e-05	2.01539e-05	3.97013e-05	48.8816	21.3428	0.0081		1.9699
Q9NP55	3.09868e-05	3.02656e-05	8.58738e-05	7.20034e-05	5.29086e-05	0.00042099	2.99344e-05	0.000309048	0.0041997	0.000157111	6	5.44076e-05	0.00102336	5.29086e-05	0.000309048	45.3328	174.115	0.1511		5.84117
P56537	2.25937e-05	2.56607e-05	2.00979e-05	6.17986e-05	0.000103937	4.2806e-05	2.68861e-05	3.87047e-05	1.45061e-05	3.44914e-05	3	4.68176e-05	3.14789e-05	2.56607e-05	3.44914e-05	77.2745	35.4728	1.0001		1.34413
P08311	0.000136786	7.43727e-05	7.41495e-05	9.50925e-05	4.94009e-05	0.000991805	0.000149707	0.000104897	9.34401e-05	0.000581344	6	8.59603e-05	0.000384238	7.43727e-05	0.000149707	38.0401	102.923	0.0561		2.01292
P07741	1.47997e-05	1.71526e-05	9.38804e-05	0.000102971	0.000234131	2.02785e-05	4.04413e-05	1.84956e-05	3.71272e-05	4.13458e-05	3	9.2587e-05	3.15377e-05	9.38804e-05	3.71272e-05	96.4309	35.5775	0.6901		0.395473
Q53FA7	1.6984e-05	1.06288e-05	7.15974e-06	1.85727e-05	6.16169e-05	1.11635e-05	2.29443e-05	4.54375e-06	1.65869e-05	0.000348872	1	2.29924e-05	8.08221e-05	1.6984e-05	1.65869e-05	96.054	185.59	1.0001		0.97662
P01133	0.00503092	0.00514271	0.00246617	0.0116491	0.00151869	0.00420735	0.00273553	5.1157e-05	0.00442176	0.00269003	3	0.00516151	0.00282117	0.00503092	0.00273553	76.6694	61.8559	0.4211		0.543744
P47755	1.7227e-05	1.13382e-05	1.03242e-05	2.20743e-05	5.33674e-05	3.72693e-05	2.07701e-05	1.85358e-05	1.56986e-05	5.35802e-05	2	2.28663e-05	2.91708e-05	1.7227e-05	2.07701e-05	77.4001	54.9184	0.4211		1.20567
P25788	1.67072e-05	2.09165e-05	3.60179e-05	7.09843e-05	0.000155049	7.34107e-05	4.83985e-05	6.01961e-05	3.69195e-05	0.000162361	3	5.99349e-05	7.62573e-05	3.60179e-05	6.01961e-05	95.5988	65.5792	0.3101		1.67128
P02750	9.84288e-05	0.000185756	0.000179914	0.000184077	0.000217695	0.000127343	0.000137682	9.99769e-05	0.000192916	0.000193158	3	0.000173174	0.000150215	0.000184077	0.000137682	25.6489	27.592	0.8411		0.747956
Q14116	4.20506e-05	4.71385e-05	0.000134271	0.000153486	0.0004575	3.22981e-05	9.29733e-05	5.09357e-05	2.52061e-05	3.46217e-05	4	0.000166889	4.7207e-05	0.000134271	3.46217e-05	101.874	57.7528	0.0951		0.257849
P00352	0.000200209	0.000303868	0.000227627	3.86536e-05	0.000343012	5.55643e-05	0.000167474	0.000126224	0.000153647	0.00011947	6	0.000222674	0.000124476	0.000227627	0.000126224	52.883	34.7328	0.1511		0.55452
O43490	2.23834e-05	4.43605e-06	2.68591e-05	1.21227e-05	1.70454e-05	1.78733e-05	1.36289e-05	2.54678e-05	3.64412e-05	7.29633e-06	2	1.65693e-05	2.01415e-05	1.70454e-05	1.78733e-05	52.8643	55.8745	0.6901		1.04857
P27348	0.000114477	0.00025576	0.000511669	0.000672954	0.00187864	0.000171746	0.00025113	0.000239331	0.000170151	0.000344823	5	0.000686701	0.000235436	0.000511669	0.000239331	102.059	30.4408	0.2221		0.467746
P12955	2.99426e-05	6.41072e-05	0.000173115	0.000219862	0.000291822	0.000230902	0.000172933	0.000102168	0.000156701	0.000132817	4	0.00015577	0.000159104	0.000173115	0.000156701	69.7017	30.2812	1.0001		0.905184
P03973	1.21989e-05	1.23001e-05	2.40359e-05	3.91424e-06	1.88525e-06	5.08179e-06	5.78487e-06	3.68288e-06	3.44228e-05	1.50448e-06	1	1.08669e-05	1.00954e-05	1.21989e-05	5.08179e-06	80.5213	135.679	0.6901		0.416577
P22061	1.24449e-05	2.67733e-05	2.59964e-05	1.38382e-05	2.6155e-05	1.60154e-05	1.69871e-05	4.57859e-05	8.97501e-06	2.29722e-05	3	2.10416e-05	2.21471e-05	2.59964e-05	1.69871e-05	34.381	63.7436	0.8411		0.65344
Q92876	6.91467e-05	0.00013596	7.13734e-05	3.16211e-05	4.53539e-05	3.09797e-05	3.22678e-05	0.000122723	0.000138536	6.24716e-05	3	7.06911e-05	7.73957e-05	6.91467e-05	6.24716e-05	56.7228	65.2665	1.0001		0.903465
Q15631	9.64087e-06	9.53183e-06	1.10557e-05	3.15916e-05	7.29018e-05	2.26426e-05	2.57045e-05	1.60738e-05	1.81594e-06	3.49781e-05	1	2.69444e-05	2.0243e-05	1.10557e-05	2.26426e-05	101.449	60.9867	1.0001		2.04804
P10599	0.000185433	0.000195315	0.000617696	0.000538431	0.00188354	0.000278803	0.000657882	0.000101836	8.88509e-05	0.000108946	4	0.000684082	0.000247263	0.000538431	0.000108946	102.114	98.022	0.2221		0.20234
P60953	7.3018e-05	1.49324e-05	4.41295e-05	2.61794e-05	4.01863e-05	0.000102595	3.49655e-05	0.000117082	2.07595e-05	6.82379e-05	2	3.96891e-05	6.8728e-05	4.01863e-05	6.82379e-05	55.2901	60.5458	0.4211		1.69804
A0A0C4DH68	0.000505861	0.000114992	0.000425801	0.000276994	0.000212775	0.000180036	0.000555302	0.000198773	0.000368221	0.000180186	3	0.000307285	0.000296504	0.000276994	0.000198773	51.5335	55.6142	0.8411		0.717608
P31151	5.01965e-05	0.000309376	0.000230188	0.000144683	0.000181925	0.000380656	0.000192113	0.000304786	0.000634356	0.000213396	4	0.000183274	0.000345061	0.000181925	0.000304786	52.6918	51.7017	0.1511		1.67534
Q8NFT8	4.36186e-05	1.79249e-05	2.18482e-05	1.16544e-05	2.23712e-06	1.04568e-05	3.70914e-05	1.63813e-06	9.1174e-06	8.90189e-06	1	1.94566e-05	1.34411e-05	1.79249e-05	9.1174e-06	79.1759	101.66	0.3101		0.508643
P25787	5.00174e-05	7.07503e-05	3.40756e-05	0.000277956	0.000233499	7.97612e-05	7.64993e-05	0.000138278	0.000195395	0.000221066	5	0.00013326	0.0001422	7.07503e-05	0.000138278	85.2795	46.2215	0.6901		1.95446
Q9UJC5	4.50524e-05	1.17402e-05	5.79225e-05	5.31057e-05	0.000133334	3.47377e-05	4.86173e-05	1.10165e-05	1.02332e-05	7.42787e-06	3	6.0231e-05	2.24065e-05	5.31057e-05	1.10165e-05	74.1657	81.7271	0.0561		0.207444
P25786	4.74868e-06	8.49382e-06	9.2704e-06	1.91253e-05	4.19833e-05	1.2883e-05	3.31696e-06	9.22957e-06	1.0771e-05	1.82972e-05	1	1.67243e-05	1.08995e-05	9.2704e-06	1.0771e-05	90.2115	50.0339	0.8411		1.16187
P31944	5.64587e-06	1.22652e-06	2.64312e-06	1.50828e-05	1.19537e-05	1.00202e-05	2.0745e-05	3.38719e-05	7.87264e-06	4.8616e-06	1	7.3104e-06	1.54743e-05	5.64587e-06	1.00202e-05	81.9431	76.9001	0.3101		1.77479
Q13231	4.30947e-05	3.73513e-05	6.09411e-05	4.19528e-05	4.83019e-05	0.000196518	4.08575e-05	0.00010331	0.000114339	0.000192692	4	4.63284e-05	0.000129544	4.30947e-05	0.000114339	19.5347	50.7047	0.0951		2.65321
P50990	5.32574e-06	7.57517e-06	2.36126e-05	1.42381e-05	9.20753e-05	3.96747e-05	2.87771e-05	3.08425e-05	1.632e-05	1.35174e-05	2	2.85654e-05	2.58263e-05	1.42381e-05	2.87771e-05	126.754	41.8611	0.4211		2.02113
P01019	2.71867e-05	1.6827e-05	0.000258604	3.14683e-05	6.24462e-05	0.000155182	0.000249295	9.43631e-05	6.05108e-05	0.000145722	4	7.93065e-05	0.000141015	3.14683e-05	0.000145722	128.189	50.8968	0.2221		4.63077
P15144	2.95763e-05	9.82678e-05	0.00023012	4.13651e-05	2.4038e-06	4.29495e-05	0.000121406	7.93836e-05	2.72616e-05	4.69907e-05	1	8.03467e-05	6.35983e-05	4.13651e-05	4.69907e-05	112.919	58.9033	0.8411		1.136
Q13630	7.11829e-05	4.60664e-05	0.000129105	0.000268233	0.000639451	5.6685e-05	9.90483e-05	8.57068e-05	8.9081e-05	0.000100128	6	0.000230808	8.61298e-05	0.000129105	8.9081e-05	105.76	20.4317	0.5481		0.689987
P13798	4.22108e-05	8.56391e-05	4.83844e-05	0.0001589	0.000233217	6.04799e-05	0.000151329	0.000110396	7.86176e-05	6.0984e-05	4	0.00011367	9.23614e-05	8.56391e-05	7.86176e-05	71.5942	41.9061	1.0001		0.918011
P00390	1.3996e-05	2.25932e-05	3.82315e-05	4.96176e-05	0.00010842	6.24369e-05	4.11087e-05	4.76156e-05	1.32897e-05	0.000102707	2	4.65717e-05	5.34317e-05	3.82315e-05	4.76156e-05	79.912	61.4074	0.8411		1.24546
P17931	9.62604e-05	0.000148846	0.000196166	0.000140093	0.00052426	3.97293e-05	0.000149341	0.000142149	0.000131851	7.15784e-05	5	0.000221125	0.00010693	0.000148846	0.000131851	78.2948	45.3974	0.2221		0.88582
Q06323	2.78257e-05	7.51769e-06	2.02337e-05	1.34102e-05	6.33579e-05	1.10351e-05	2.07113e-05	2.64314e-05	9.0413e-06	2.27013e-05	2	2.64691e-05	1.79841e-05	2.02337e-05	2.07113e-05	83.0128	42.1009	0.8411		1.0236
P84077	5.68848e-05	0.000108214	6.86021e-05	3.73084e-05	5.69868e-05	0.000160721	7.38726e-05	0.000135925	0.000163336	0.00018571	3	6.55993e-05	0.000143913	5.69868e-05	0.000160721	40.1556	29.8392	0.0161		2.82033
P04196	1.56843e-05	1.0819e-05	1.30067e-05	1.09293e-05	1.09374e-05	4.14096e-05	2.8406e-05	7.50385e-05	2.62007e-05	7.22701e-05	3	1.22753e-05	4.8665e-05	1.09374e-05	4.14096e-05	17.2228	48.4146	0.0081		3.78606
P09972	1.48573e-05	1.33554e-05	4.06161e-05	5.60564e-05	0.000164266	4.88714e-05	3.39201e-05	8.69931e-05	0.000102522	4.10721e-05	3	5.78303e-05	6.26757e-05	4.06161e-05	4.88714e-05	107.478	48.2839	0.5481		1.20325
Q9NUQ9	4.34647e-05	5.33418e-05	3.78938e-05	3.22594e-05	8.59117e-05	0.000101002	4.26412e-05	4.20678e-05	7.59833e-05	0.000225352	4	5.05743e-05	9.74093e-05	4.34647e-05	7.59833e-05	41.9815	77.6823	0.3101		1.74816
P16083	1.95635e-05	4.83998e-06	1.48401e-06	1.9139e-05	3.24372e-05	6.10786e-06	2.0211e-05	1.69986e-05	8.93753e-06	3.32612e-05	1	1.54927e-05	1.71033e-05	1.9139e-05	1.69986e-05	80.793	62.5863	0.6901		0.888168
P17858	1.44246e-05	6.53252e-06	5.32789e-05	1.98311e-06	3.06983e-05	3.15278e-06	1.06191e-05	5.10251e-05	2.78792e-06	9.47612e-06	1	2.13835e-05	1.54122e-05	1.44246e-05	9.47612e-06	97.8004	131.225	0.6901		0.656941
O95716	8.69131e-06	3.99988e-06	1.00183e-05	6.24508e-06	2.71442e-05	1.27669e-05	1.47858e-05	8.19314e-06	7.62514e-06	5.75706e-05	1	1.12197e-05	2.01883e-05	8.69131e-06	1.27669e-05	81.9665	104.592	0.4211		1.46893
Q9UBR2	0.000145948	0.000132945	0.000103534	0.000104542	4.09269e-05	6.20351e-05	0.0001007	3.7363e-05	7.52248e-05	0.000113066	3	0.000105579	7.76778e-05	0.000104542	7.52248e-05	38.3678	38.9328	0.2221		0.719567
P19971	5.8613e-05	2.85368e-05	0.000116785	0.000210772	0.0003237	6.59528e-05	0.000189567	8.72856e-05	0.000219613	0.000103892	5	0.000147681	0.000133262	0.000116785	0.000103892	81.57	50.5249	1.0001		0.8896
Q9UKR3	1.86693e-05	2.9137e-05	4.43953e-05	0.000109415	0.00011121	8.3611e-05	3.83315e-05	0.000113318	0.000249559	7.49758e-05	3	6.25654e-05	0.000111959	4.43953e-05	8.3611e-05	71.1915	72.7383	0.3101		1.88333
P49721	6.17773e-05	8.99592e-06	1.45415e-05	2.94046e-05	6.98867e-05	2.43421e-05	5.62175e-05	2.22723e-05	1.13015e-05	4.18777e-05	1	3.69212e-05	3.12022e-05	2.94046e-05	2.43421e-05	74.6886	56.9394	0.8411		0.827835
O95274	0.000395699	0.000325333	0.000330519	0.000653157	0.00062572	0.000230876	0.000334163	0.000321091	0.000274659	0.000162151	5	0.000466085	0.000264588	0.000395699	0.000274659	34.5328	26.5671	0.0321	-1.44069	0.694111
P32119	5.02864e-05	7.67534e-05	0.000149895	0.000145272	0.000468468	0.000190058	0.000116077	8.95116e-05	0.00038899	0.000117017	4	0.000178135	0.000180331	0.000145272	0.000117017	94.2679	67.9271	0.8411		0.805502
P08865	2.36316e-05	3.9688e-05	2.89368e-05	4.15141e-05	6.18375e-05	2.67613e-05	3.5441e-05	5.36173e-05	5.49922e-05	5.07261e-05	2	3.91216e-05	4.43076e-05	3.9688e-05	5.07261e-05	37.6048	28.2911	0.6901		1.27812
P61916	3.04283e-06	1.77684e-05	1.37421e-05	1.87192e-05	2.77021e-05	7.94637e-05	1.53029e-05	4.65547e-05	6.94152e-05	6.84484e-05	2	1.61949e-05	5.5837e-05	1.77684e-05	6.84484e-05	55.251	45.9296	0.0561		3.85225
P43652	1.57966e-05	1.89168e-05	3.42207e-05	9.16076e-06	1.28835e-05	3.43636e-05	2.40708e-05	4.65206e-05	2.26485e-05	7.73189e-05	3	1.81957e-05	4.09845e-05	1.57966e-05	3.43636e-05	53.0657	54.7897	0.0321		2.17539
P25774	0.000254148	3.50646e-05	0.000429697	2.64233e-05	4.69124e-05	0.000157164	7.88689e-05	0.000265221	4.62443e-05	0.000187307	3	0.000158449	0.000146961	4.69124e-05	0.000157164	112.822	59.4158	0.6901		3.35016
P16870	8.36059e-07	7.34949e-06	3.03387e-06	6.94628e-06	6.9711e-06	5.81954e-06	1.67639e-05	7.90955e-06	1.08528e-05	3.35141e-06	1	5.02736e-06	8.93943e-06	6.94628e-06	7.90955e-06	58.327	57.8303	0.2221		1.13868
Q6FI13	0.000468153	0.000231003	5.48719e-06	1.95348e-05	0.000143289	0.000412706	8.30474e-06	0.000355223	7.22024e-05	7.37575e-05	3	0.000173493	0.000184439	0.000143289	7.37575e-05	108.972	100.394	1.0001		0.514746
Q9UN36	4.57242e-05	0.000109306	0.000155645	0.000147994	0.000469624	5.99536e-05	0.000116879	8.93884e-05	5.35916e-05	3.92246e-05	6	0.000185659	7.18075e-05	0.000147994	5.99536e-05	88.6551	43.3421	0.1511		0.405107
P14735	1.56103e-05	9.36816e-06	9.36088e-06	2.18008e-05	3.76922e-05	1.24243e-05	1.13213e-05	1.25191e-05	0.000241647	2.64808e-05	1	1.87665e-05	6.08784e-05	1.56103e-05	1.25191e-05	62.719	166.308	0.6901		0.801979
O75594	1.64465e-05	6.92056e-05	8.84126e-05	6.99594e-05	8.66946e-05	0.00042048	0.000125712	0.000203372	1.6238e-05	0.00063795	3	6.61437e-05	0.000280751	6.99594e-05	0.000203372	44.1556	88.5303	0.1511		2.907
P35030	0.0759186	0.0505534	0.0389333	0.0339322	0.0312221	0.0612917	0.0673448	0.0536717	0.0393428	0.0493263	3	0.0461119	0.0541955	0.0389333	0.0536717	39.5405	19.9554	0.3101		1.37856
P02042	2.98126e-06	0.000125321	0.000110492	9.03919e-05	1.3983e-05	3.9235e-05	3.27999e-05	0.000116976	6.28426e-06	0.000180443	2	6.86339e-05	7.51476e-05	9.03919e-05	3.9235e-05	82.2142	95.6402	0.8411		0.434054
P05090	2.99687e-06	1.08877e-05	1.3784e-05	5.42177e-06	6.81199e-06	3.49506e-05	6.12171e-06	3.20506e-05	1.64061e-05	3.68982e-05	2	7.98048e-06	2.52854e-05	6.81199e-06	3.20506e-05	54.2163	53.0646	0.0561		4.70504
Q6IBS0	0.00010025	5.86837e-06	2.68748e-06	7.97044e-06	2.13465e-05	1.51094e-05	1.07791e-05	1.61954e-05	7.9003e-06	4.30294e-05	1	2.76245e-05	1.86027e-05	7.97044e-06	1.51094e-05	149.204	75.565	0.6901		1.89568
Q6BCY4	0.00017047	2.78582e-06	6.93171e-05	7.80272e-06	1.86642e-05	4.03758e-05	6.88365e-05	6.6966e-05	3.77989e-06	4.15589e-05	1	5.3808e-05	4.43034e-05	1.86642e-05	4.15589e-05	130.772	59.5114	1.0001		2.22666
P01619	0.00313222	0.00076193	0.00161606	0.00161467	0.00111303	0.00129785	0.00363103	0.00168065	0.00264303	0.00113094	4	0.00164758	0.0020767	0.00161467	0.00168065	54.931	50.4726	0.4211		1.04086
Q96IU4	1.85109e-05	6.80666e-06	1.91429e-05	1.45549e-05	3.31366e-05	1.65771e-05	5.56676e-06	3.42852e-06	8.9932e-06	6.67736e-06	1	1.84304e-05	8.24859e-06	1.85109e-05	6.67736e-06	51.966	61.463	0.0561		0.360726
P13693	3.94742e-05	0.000105011	0.000145904	0.000192248	0.000135942	5.27061e-05	5.10861e-05	0.000139644	0.000173441	7.99986e-05	3	0.000123716	9.93751e-05	0.000135942	7.99986e-05	45.6978	55.0996	0.6901		0.588475
P28062	1.14419e-05	2.01658e-05	1.14982e-05	7.7384e-06	1.7734e-05	9.64183e-05	2.25573e-06	2.53649e-05	3.68598e-05	3.55285e-06	1	1.37157e-05	3.28903e-05	1.14982e-05	2.53649e-05	37.099	116.842	0.6901		2.20599
P30085	3.29859e-06	4.0498e-05	1.50953e-05	1.01815e-05	3.87409e-05	1.66844e-06	5.6967e-06	9.13286e-06	9.97896e-07	9.00431e-06	1	2.15628e-05	5.30004e-06	1.50953e-05	5.6967e-06	78.927	73.2366	0.0561		0.377383
P06312	0.00318662	0.000471258	0.00176665	0.00194394	0.000516412	0.00148041	0.0044415	0.000995128	0.00150371	0.00165963	3	0.00157698	0.00201608	0.00176665	0.00150371	71.666	68.3776	1.0001		0.851163
P30040	0.000145446	2.9852e-05	1.57521e-05	1.92232e-05	0.000102109	6.56174e-05	2.51973e-05	0.000112582	5.97038e-05	2.55629e-05	2	6.24765e-05	5.77327e-05	2.9852e-05	5.97038e-05	93.2379	62.2598	0.8411		2
P07711	0.000307711	0.000226992	0.000158241	0.000113541	6.66897e-05	0.000116504	0.00012846	0.000139602	8.54568e-05	0.000159003	3	0.000174635	0.000125805	0.000158241	0.00012846	54.4021	21.8194	0.6901		0.8118
P43251	2.76717e-05	3.45134e-05	9.21944e-05	0.000160651	0.000144022	2.18251e-05	5.25493e-05	2.57142e-05	2.64168e-05	1.59332e-05	2	9.18105e-05	2.84877e-05	9.21944e-05	2.57142e-05	66.392	49.4235	0.0321	-3.58535	0.278913
P02743	7.74445e-06	5.30807e-06	2.74191e-05	2.56415e-05	2.5468e-05	8.41402e-05	3.43275e-05	4.39828e-05	3.17136e-05	5.11032e-05	2	1.83162e-05	4.90535e-05	2.5468e-05	4.39828e-05	59.0957	42.9862	0.0081		1.72699
P04003	1.15212e-05	1.27738e-05	1.72735e-06	2.93163e-06	7.14657e-06	2.5424e-05	4.74433e-05	4.30174e-05	3.65926e-06	2.69879e-05	2	7.2201e-06	2.93063e-05	7.14657e-06	2.69879e-05	68.5234	58.9823	0.0561		3.77634
Q96C19	0.00181683	7.92204e-06	0.000866144	0.000666937	1.87793e-05	3.08015e-05	1.03024e-05	0.00103518	2.48121e-05	0.000873877	1	0.000675323	0.000394995	0.000666937	3.08015e-05	110.216	130.131	1.0001		0.0461835
Q01459	0.00010004	5.9762e-05	5.21658e-05	6.07309e-05	5.42947e-05	3.88741e-05	4.4222e-05	5.07298e-05	3.16105e-05	8.66571e-05	4	6.53987e-05	5.04187e-05	5.9762e-05	4.4222e-05	30.1193	42.5245	0.0951		0.739968
P49419	8.26018e-05	6.55184e-05	0.000198423	9.99956e-05	0.000235445	0.000106496	7.62853e-05	0.000131798	3.47561e-05	4.53373e-05	4	0.000136397	7.89345e-05	9.99956e-05	7.62853e-05	55.4738	51.6229	0.3101		0.762887
P00441	5.17158e-06	0.000299191	2.01601e-05	2.58817e-06	1.04365e-05	4.67114e-06	1.11137e-05	8.5328e-06	1.24455e-05	7.40242e-06	1	6.75095e-05	8.83312e-06	1.04365e-05	8.5328e-06	192.104	34.7603	0.8411		0.817592
P33908	2.97838e-05	3.60102e-05	2.05806e-05	2.72817e-05	1.68303e-05	1.40613e-05	9.98202e-06	3.67477e-05	2.79748e-05	3.16453e-05	1	2.60973e-05	2.40822e-05	2.72817e-05	2.79748e-05	29.0289	47.8883	1.0001		1.0254
Q8NBJ4	9.28401e-06	5.31138e-06	2.78162e-06	4.80922e-06	2.41353e-06	4.54341e-06	5.32929e-06	5.38696e-06	5.05834e-06	1.33668e-06	1	4.91995e-06	4.33094e-06	4.80922e-06	5.05834e-06	55.7238	39.4079	1.0001		1.0518
Q04917	1.52059e-05	2.99137e-05	1.86063e-05	2.48828e-05	4.0008e-05	4.06868e-05	1.76627e-05	2.26127e-05	1.5607e-05	8.17914e-05	2	2.57233e-05	3.56721e-05	2.48828e-05	2.26127e-05	38.0692	77.4042	0.8411		0.908771
P00918	3.86952e-06	2.23958e-06	7.22433e-06	1.13575e-05	1.7382e-05	3.06961e-05	1.75024e-05	2.3074e-06	1.17347e-05	2.63728e-05	1	8.41459e-06	1.77227e-05	7.22433e-06	1.75024e-05	72.6005	64.1279	0.1511		2.42271
O00584	9.18642e-05	5.4926e-05	8.49899e-05	6.82794e-05	3.47157e-05	2.55015e-05	1.5383e-05	2.67774e-05	2.28278e-05	7.64591e-05	2	6.6955e-05	3.33898e-05	6.82794e-05	2.55015e-05	34.4774	73.3103	0.0561		0.373487
P30046	8.26207e-05	9.47324e-06	1.86399e-05	1.35729e-05	9.67604e-05	2.72788e-05	0.000105433	2.61942e-05	3.86423e-05	5.01112e-06	2	4.42134e-05	4.05118e-05	1.86399e-05	2.72788e-05	94.8592	94.4683	0.8411		1.46346
Q05315	2.00642e-05	3.24737e-05	8.48471e-05	5.35007e-05	9.20142e-05	0.000330708	6.82263e-05	0.000146986	0.000660959	0.000672107	4	5.658e-05	0.000375797	5.35007e-05	0.000330708	55.7407	75.0414	0.0321		6.18139
O75390	0.000114733	7.25669e-05	6.77284e-05	0.00012948	0.000199028	6.79246e-05	0.000325363	4.13286e-05	3.56837e-05	8.23332e-05	3	0.000116707	0.000110527	0.000114733	6.79246e-05	45.5238	110.026	0.4211		0.592024
P28161	3.05309e-05	1.86865e-05	4.20563e-05	3.12093e-06	1.46463e-05	3.57079e-06	2.07355e-05	3.79944e-05	4.33169e-06	1.36271e-05	1	2.18082e-05	1.60519e-05	1.86865e-05	1.36271e-05	68.641	88.2363	0.6901		0.72925
P11215	8.52224e-06	7.02008e-06	1.81329e-05	1.01808e-05	2.84555e-05	6.04421e-05	1.13875e-05	1.58269e-05	7.93718e-06	3.24419e-05	2	1.44623e-05	2.56071e-05	1.01808e-05	1.58269e-05	61.6796	84.4426	0.4211		1.55459
P02545	1.0155e-05	2.09974e-05	4.75812e-06	2.78928e-06	2.61146e-06	2.40088e-05	7.34769e-06	5.88338e-06	1.54867e-06	5.64809e-06	1	8.26225e-06	8.88733e-06	4.75812e-06	5.88338e-06	93.7377	98.1572	0.8411		1.23649
P53634	0.000118205	0.000358287	0.000237791	6.78919e-05	6.89816e-05	0.000230677	0.000164944	7.14863e-05	0.000383528	9.19294e-05	4	0.000170231	0.000188513	0.000118205	0.000164944	73.9335	66.7776	0.6901		1.39541
P26641	3.79076e-05	8.70482e-05	4.03934e-05	9.92914e-05	0.000149245	1.31795e-05	3.40085e-05	6.68294e-05	7.98044e-05	6.81236e-05	2	8.27772e-05	5.23891e-05	8.70482e-05	6.68294e-05	55.75	52.9922	0.2221		0.767728
A0A0B4J1V0	0.00030195	4.43847e-05	9.08772e-05	0.000144523	5.92079e-05	6.40988e-05	0.000158721	9.50875e-05	8.90455e-05	9.69638e-05	3	0.000128188	0.000100783	9.08772e-05	9.50875e-05	81.476	34.6829	0.8411		1.04633
P55263	3.07479e-05	2.40579e-05	0.000134546	0.000106748	0.000152729	7.98863e-05	9.2285e-05	2.92047e-05	2.5097e-05	7.83064e-05	3	8.97657e-05	6.09559e-05	0.000106748	7.83064e-05	66.0436	51.4543	0.4211		0.733562
P61970	1.17514e-05	2.57751e-05	1.94651e-05	0.000103607	0.000154414	3.6475e-05	6.87626e-05	6.63672e-05	2.36015e-05	4.74614e-05	2	6.30026e-05	4.85336e-05	2.57751e-05	4.74614e-05	100.112	39.8391	0.8411		1.84137
Q13404	5.1963e-06	1.74779e-05	3.88336e-05	3.96703e-05	0.000136511	4.01174e-05	5.16135e-05	7.92363e-06	1.90257e-05	2.68884e-05	2	4.75378e-05	2.91137e-05	3.88336e-05	2.68884e-05	109.054	59.0712	1.0001		0.692399
P21399	2.96839e-05	8.24164e-05	2.42131e-05	6.13263e-05	0.000106723	2.15585e-05	2.1454e-05	3.03966e-05	5.07727e-05	4.32529e-05	3	6.08726e-05	3.34869e-05	6.13263e-05	3.03966e-05	57.3989	39.2438	0.2221		0.495653
P61088	2.52523e-05	2.41542e-05	4.53427e-05	4.21424e-05	0.00010179	4.99332e-05	1.6942e-05	4.78615e-05	3.83047e-05	5.81473e-05	3	4.77364e-05	4.22377e-05	4.21424e-05	4.78615e-05	66.4141	37.4212	0.8411		1.13571
Q9BRA2	0.00149827	0.00118904	5.2971e-05	0.000476119	0.000209202	5.09463e-05	0.000133957	0.000245122	5.82812e-05	8.00751e-05	3	0.000685121	0.000113676	0.000476119	8.00751e-05	91.8776	70.6798	0.1511		0.168183
Q86VP6	9.46331e-06	3.44277e-06	5.05447e-06	2.34826e-05	2.52038e-05	3.44003e-05	4.24806e-06	4.36668e-06	1.12322e-05	2.58847e-05	1	1.33294e-05	1.60264e-05	9.46331e-06	1.12322e-05	77.3544	84.4351	0.6901		1.18692
P06310	0.000368601	6.31709e-05	0.00023091	0.000174939	9.77752e-06	0.000216099	0.000478734	1.89333e-05	0.000300077	0.000175393	2	0.00016948	0.000237847	0.000174939	0.000216099	83.5795	71.039	0.5481		1.23528
P15559	2.09358e-05	7.18007e-06	5.73627e-05	7.33816e-06	5.07658e-05	1.4938e-05	2.05983e-05	6.52699e-06	1.98026e-05	1.81187e-05	2	2.87165e-05	1.59969e-05	2.09358e-05	1.81187e-05	83.288	35.7686	0.4211		0.865443
P60660	7.05958e-06	6.32808e-06	5.47879e-05	1.89104e-05	9.36362e-06	1.68733e-05	1.20023e-05	4.76233e-05	6.28856e-06	2.55956e-05	2	1.92899e-05	2.16766e-05	9.36362e-06	1.68733e-05	106.127	74.4598	0.8411		1.80201
P23381	3.9324e-05	3.79061e-05	5.49867e-05	2.43121e-05	5.84123e-05	2.72528e-05	3.00095e-05	2.21072e-05	5.16365e-05	3.78722e-05	2	4.29882e-05	3.37756e-05	3.9324e-05	3.00095e-05	32.2733	34.0378	0.2221		0.763135
Q92747	1.11432e-05	1.26237e-05	8.53178e-05	5.29762e-05	0.000129828	9.72106e-06	2.19819e-05	2.31426e-05	4.29956e-05	0.000239977	2	5.83778e-05	6.75637e-05	5.29762e-05	2.31426e-05	86.4361	143.741	0.8411		0.43685
P01624	0.00081728	0.00020902	0.000420235	0.000463172	0.000274421	0.00024823	0.000715272	0.000487886	0.000437991	0.000438906	5	0.000436825	0.000465657	0.000420235	0.000438906	54.1716	35.8635	0.6901		1.04443
P28838	8.95926e-05	1.60544e-05	3.86448e-05	1.96815e-05	4.56495e-05	2.0685e-05	2.4363e-05	2.11439e-05	1.2456e-05	5.91568e-06	2	4.19246e-05	1.69127e-05	3.86448e-05	2.0685e-05	70.161	44.6827	0.2221		0.535258
P48147	0.0001096	9.05347e-05	8.88302e-05	0.000147194	0.000156035	8.62996e-05	9.2876e-05	2.64085e-05	6.77976e-05	0.000132753	3	0.000118439	8.1227e-05	0.0001096	8.62996e-05	26.6119	47.6881	0.1511		0.787405
A0A0C4DH72	0.000408275	6.49245e-05	5.98978e-05	5.4661e-05	0.000213385	0.000210052	0.000230456	6.07396e-05	0.000145975	0.000244325	1	0.000160229	0.00017831	6.49245e-05	0.000210052	96.0024	42.4831	0.5481		3.23532
P09417	2.40293e-06	4.09786e-06	1.05978e-05	6.25919e-06	1.32007e-06	5.79051e-06	2.60849e-06	3.16566e-06	2.44539e-06	7.46781e-06	1	4.93556e-06	4.29557e-06	4.09786e-06	3.16566e-06	74.4443	51.8518	1.0001		0.772516
P02760	9.85478e-06	1.97035e-05	2.69071e-05	2.69619e-05	9.87652e-06	9.29891e-05	1.34759e-05	0.000101254	1.82716e-05	8.74481e-05	2	1.86608e-05	6.26877e-05	1.97035e-05	8.74481e-05	45.8413	68.6737	0.2221		4.4382
A0A0A0MS15	0.00105661	0.000114091	0.000159956	0.000217511	0.000118932	0.000274192	0.000962528	0.00032997	0.00014762	0.00027755	2	0.00033342	0.000398372	0.000159956	0.00027755	121.888	80.9372	0.3101		1.73517
Q86UX7	3.84568e-05	6.13804e-06	8.80986e-06	4.08934e-06	6.86245e-06	2.26318e-05	3.59659e-06	1.44473e-05	6.21475e-06	3.75124e-05	1	1.28713e-05	1.68806e-05	6.86245e-06	1.44473e-05	111.893	81.3815	0.8411		2.10527
Q6MZM9	1.03708e-05	1.28917e-06	1.66925e-05	4.01385e-05	4.4346e-05	2.17611e-05	8.55752e-06	1.08247e-05	6.51595e-05	3.51174e-05	1	2.25674e-05	2.8284e-05	1.66925e-05	2.17611e-05	83.4627	81.8353	0.8411		1.30364
P31150	2.15088e-05	3.11328e-05	2.9023e-05	5.35496e-05	0.00013849	2.32073e-05	4.94963e-05	4.76599e-05	2.2006e-05	0.000100583	3	5.47408e-05	4.85904e-05	3.11328e-05	4.76599e-05	88.2664	65.5336	1.0001		1.53086
P78330	4.72973e-06	2.26091e-06	9.49268e-06	1.10516e-05	1.75022e-05	1.10771e-05	1.1096e-06	0.000136291	4.63375e-06	6.18767e-05	1	9.00742e-06	4.29977e-05	9.49268e-06	1.10771e-05	65.7712	134.134	0.6901		1.16691
Q99439	0.000257572	3.83556e-05	1.45751e-05	0.000135399	0.000145014	0.000193145	5.05071e-06	0.000191406	1.06341e-05	7.52019e-05	1	0.000118183	9.50876e-05	0.000135399	7.52019e-05	81.985	97.707	0.6901		0.555408
P20700	3.04532e-05	1.41161e-06	1.39039e-05	1.54268e-06	3.68187e-06	1.8164e-05	2.78832e-05	1.91427e-06	3.71362e-06	1.09466e-05	1	1.01986e-05	1.25243e-05	3.68187e-06	1.09466e-05	121.934	85.6603	0.5481		2.9731
P99999	5.44094e-06	1.36954e-05	1.3577e-05	1.9896e-05	3.37325e-05	1.18804e-05	2.0804e-05	1.3866e-05	9.39585e-06	3.20386e-05	2	1.72684e-05	1.7597e-05	1.36954e-05	1.3866e-05	61.0286	51.8276	1.0001		1.01246
Q96NY8	4.14455e-06	9.22989e-06	9.41653e-06	3.00383e-05	2.95837e-05	6.14693e-06	1.29585e-05	4.99594e-06	9.00415e-06	2.52215e-06	2	1.64826e-05	7.12554e-06	9.41653e-06	6.14693e-06	74.9315	56.24	0.2221		0.65278
A0A0C4DH38	0.000418161	0.000158701	8.72019e-05	0.000145791	8.00055e-05	0.0001679	0.000241296	0.000221044	8.14543e-05	0.000298728	3	0.000177972	0.000202085	0.000145791	0.000221044	77.9252	40.6232	0.4211		1.51617
O75368	2.41059e-06	6.5722e-06	1.20018e-05	1.41751e-05	2.69995e-05	3.44666e-05	1.5136e-05	8.41395e-06	7.7321e-06	2.70398e-05	1	1.24318e-05	1.85577e-05	1.20018e-05	1.5136e-05	75.2651	63.5785	0.3101		1.26114
P01860	5.56554e-05	1.49551e-05	1.77959e-05	1.64416e-05	2.71027e-05	7.92575e-05	2.32535e-05	7.86213e-05	1.27712e-05	5.0993e-05	1	2.63901e-05	4.89793e-05	1.77959e-05	5.0993e-05	64.545	62.6991	0.4211		2.86544
P49368	1.62293e-06	2.30656e-06	3.51173e-07	1.23871e-05	3.07276e-05	1.44033e-06	5.16137e-07	6.95138e-06	2.32556e-07	9.91926e-07	1	9.47908e-06	2.02647e-06	2.30656e-06	9.91926e-07	135.145	137.747	0.2221		0.430045
P34096	1.84596e-06	1.83467e-06	1.35994e-05	1.06592e-05	9.63045e-06	1.91742e-05	8.59231e-06	9.65315e-06	2.26738e-05	2.54948e-07	1	7.51394e-06	1.20697e-05	9.63045e-06	9.65315e-06	71.6027	74.1564	0.6901		1.00236
Q9NX46	5.25937e-06	5.24248e-05	2.55413e-05	7.77978e-05	3.7502e-05	8.88619e-06	4.98548e-06	2.36124e-05	2.17126e-05	3.32423e-06	1	3.9705e-05	1.25042e-05	3.7502e-05	8.88619e-06	69.0293	76.0881	0.0561		0.236952
Q9UHY7	0.000270073	0.000207271	9.32551e-05	0.000156523	7.62533e-05	0.000227018	0.00027021	0.000244111	0.000138947	0.000242058	1	0.000160675	0.000224469	0.000156523	0.000242058	50.0119	22.3946	0.2221		1.54647
Q10567	8.94542e-06	2.80854e-06	8.45754e-06	9.05396e-07	2.15539e-06	1.1219e-05	3.87362e-07	4.44211e-06	3.69932e-06	1.10112e-05	1	4.65446e-06	6.15181e-06	2.80854e-06	4.44211e-06	80.8068	77.7277	0.5481		1.58165
P04433	0.00108187	0.00040702	0.000541979	0.00109284	0.000705493	0.000661413	0.00110255	0.000927249	0.00102666	0.000823768	3	0.000765841	0.000908328	0.000705493	0.000927249	40.7363	19.0844	0.5481		1.31433
A0A075B6K4	0.000355247	0.000210017	0.000266006	0.000221554	8.1875e-05	0.000186846	0.000135259	0.000265299	0.000258543	0.000355885	3	0.00022694	0.000240367	0.000221554	0.000258543	43.704	34.9371	1.0001		1.16695
Q8TAX7	0.000320013	0.000405342	0.00218889	0.00121092	0.000105874	0.000651694	0.000288645	0.000308397	0.000199491	0.000284374	3	0.000846208	0.00034652	0.000405342	0.000288645	101.574	50.6901	0.3101		0.712102
P12109	1.88232e-06	1.67498e-05	1.04311e-05	6.90313e-06	3.57458e-06	1.33218e-05	4.13348e-06	7.85338e-06	8.94298e-06	2.11017e-05	1	7.90819e-06	1.10707e-05	6.90313e-06	8.94298e-06	74.9807	58.6601	0.4211		1.2955
P12724	1.30017e-05	3.24422e-06	6.04046e-06	1.70614e-05	1.16389e-05	4.15094e-05	2.83252e-05	3.78098e-05	2.11446e-05	3.82793e-05	1	1.01973e-05	3.34137e-05	1.16389e-05	3.78098e-05	54.3096	25.2604	0.0081		3.24858
O95833	2.49519e-06	1.56979e-05	6.91248e-06	1.39517e-05	1.25786e-05	7.90481e-06	7.59223e-06	6.54371e-05	2.41994e-06	2.86425e-06	1	1.03272e-05	1.72437e-05	1.25786e-05	7.59223e-06	53.0483	156.941	0.6901		0.603582
P62987	0.000182591	0.000221134	0.000394896	0.000317044	0.000936822	0.000676696	0.000322142	0.000410248	0.000366743	0.000594984	3	0.000410497	0.000474162	0.000317044	0.000410248	74.4691	32.3905	0.3101		1.29398
P06753	8.56798e-06	1.76788e-05	2.25166e-06	1.81293e-05	9.80111e-06	0.000114899	7.24231e-06	9.05919e-06	1.00039e-05	1.13156e-05	1	1.12858e-05	3.0504e-05	9.80111e-06	1.00039e-05	59.2593	154.739	0.8411		1.02069
P15531	0.000212282	1.88381e-05	1.98919e-05	0.000101705	0.000121352	4.33173e-05	0.000177985	0.000137232	2.96403e-05	0.000115087	2	9.48138e-05	0.000100652	0.000101705	0.000115087	84.9279	62.5538	0.6901		1.13157
P02810	0.000291499	0.000323747	0.00112077	0.000992582	0.00166856	8.2945e-05	0.000192169	0.000259715	0.000322189	0.000447105	4	0.000879431	0.000260825	0.000992582	0.000259715	66.0158	52.4367	0.0561		0.261656
P15328	9.50177e-05	8.30932e-05	9.77904e-05	7.07161e-05	7.87875e-05	0.000118317	0.00014591	0.000147932	0.000121968	7.7426e-05	3	8.5081e-05	0.00012231	8.30932e-05	0.000121968	13.2739	23.2836	0.0951		1.46785
P07686	5.65724e-05	5.39876e-05	2.45523e-05	0.000188002	2.45566e-05	0.000267158	5.43931e-05	0.000340666	5.65171e-05	0.00021848	2	6.95342e-05	0.000187443	5.39876e-05	0.00021848	97.7797	68.3411	0.0951		4.04686
P14324	8.60275e-06	1.18958e-05	1.43526e-05	4.80724e-05	9.10017e-05	5.8134e-06	1.08243e-05	6.38646e-06	1.60124e-05	2.49316e-05	1	3.4785e-05	1.27936e-05	1.43526e-05	1.08243e-05	101.271	61.9598	0.3101		0.754171
Q04828	2.51226e-07	1.68915e-06	5.68695e-06	1.23943e-05	3.97924e-05	1.17244e-06	6.23303e-06	1.46849e-06	9.18833e-06	6.77909e-06	1	1.19628e-05	4.96827e-06	5.68695e-06	6.23303e-06	135.871	70.6941	0.8411		1.09602
O00560	0.000145784	3.77791e-05	0.000342357	7.0655e-05	5.63412e-05	4.13516e-05	0.000146116	3.34442e-05	4.45023e-05	9.63405e-05	2	0.000130583	7.23509e-05	7.0655e-05	4.45023e-05	95.9501	66.5268	0.5481		0.629854
P51148	4.59124e-06	5.0832e-06	1.94876e-05	1.74146e-05	4.05898e-05	3.6974e-05	1.90438e-05	2.29785e-05	1.53779e-06	5.26047e-05	1	1.74333e-05	2.66278e-05	1.74146e-05	2.29785e-05	84.0051	72.2914	0.5481		1.3195
Q9H0W9	9.84735e-06	1.33191e-05	3.66484e-05	2.20155e-05	5.95736e-05	1.35056e-05	3.60268e-06	6.77014e-06	3.11438e-06	2.01464e-05	1	2.82808e-05	9.42784e-06	2.20155e-05	6.77014e-06	71.8627	77.2869	0.0951		0.307518
P06331	0.00276039	0.0013605	0.0011491	0.00161732	0.000853887	0.00103743	0.00152976	0.00114542	0.00101967	0.000937793	3	0.00154824	0.00113402	0.0013605	0.00103743	47.3619	20.5699	0.3101		0.762534
Q16651	1.15437e-05	1.76628e-05	4.73804e-05	0.000272025	2.39935e-05	0.000141044	4.50487e-05	6.21323e-05	7.23107e-05	2.6863e-05	2	7.45211e-05	6.94798e-05	2.39935e-05	6.21323e-05	149.272	62.7219	0.3101		2.58955
O60664	5.15988e-05	3.09011e-05	2.31982e-05	3.02446e-05	9.53194e-05	1.64616e-05	2.24236e-05	3.75148e-05	1.89173e-05	1.3853e-05	2	4.62524e-05	2.18341e-05	3.09011e-05	1.89173e-05	63.5838	42.6764	0.0561		0.61219
Q9NQ38	1.90493e-05	1.43628e-05	3.02742e-05	2.55779e-05	5.88785e-05	1.28322e-05	2.47414e-05	1.96317e-05	7.35813e-06	1.19041e-05	1	2.96285e-05	1.52935e-05	2.55779e-05	1.28322e-05	58.8799	44.8986	0.0951		0.501692
P19105	1.30189e-05	8.45241e-06	7.84922e-06	4.76469e-05	3.66049e-05	1.96533e-06	1.61685e-05	1.21467e-05	1.9402e-06	2.31919e-05	1	2.27145e-05	1.10825e-05	1.30189e-05	1.21467e-05	80.3665	83.2317	0.4211		0.933005
P47929	2.10142e-06	1.55126e-05	1.12373e-06	0.000119941	9.57326e-06	4.02666e-06	3.76826e-06	7.92074e-06	3.54031e-05	1.47383e-05	1	2.96505e-05	1.31714e-05	9.57326e-06	7.92074e-06	171.376	100.171	1.0001		0.827382
P01861	7.94409e-05	0.000152927	0.000184775	0.00010101	0.000673236	0.00291727	0.000534887	0.000267918	0.000116317	6.39644e-05	2	0.000238278	0.000780071	0.000152927	0.000267918	103.527	154.942	0.6901		1.75193
P19652	8.93403e-05	3.50744e-05	5.08499e-05	3.24733e-05	5.74552e-05	0.000155117	5.54941e-05	0.000153507	6.9443e-05	0.000161506	2	5.30386e-05	0.000119013	5.08499e-05	0.000153507	43.0742	43.6416	0.0561		3.01883
P0DOX3	0.000272902	6.98224e-05	0.000130887	0.000223822	0.000148062	0.000121694	0.000212798	0.000124808	0.000225864	8.41077e-05	3	0.000169099	0.000153854	0.000148062	0.000124808	47.2432	40.3324	0.6901		0.842942
Q13907	0.000170561	1.21481e-05	9.401e-05	3.95037e-05	9.48288e-05	1.50355e-05	5.25734e-05	0.000136096	2.62701e-05	2.59151e-05	3	8.22104e-05	5.11781e-05	9.401e-05	2.62701e-05	74.0824	96.6073	0.5481		0.27944
Q16658	1.01725e-05	9.26451e-06	8.58508e-06	1.03795e-05	2.69562e-05	6.67081e-06	5.67907e-06	6.47802e-06	3.4828e-06	8.26364e-06	2	1.30716e-05	6.11487e-06	1.01725e-05	6.47802e-06	59.6343	28.532	0.0081	-1.57031	0.636818
P16930	0.000175658	1.04641e-05	4.03778e-05	4.59595e-05	9.03768e-05	3.65914e-05	3.9547e-05	3.35987e-06	7.66457e-06	7.53419e-05	2	7.25672e-05	3.25009e-05	4.59595e-05	3.65914e-05	88.6284	89.2783	0.1511		0.796165
P04899	1.02389e-05	9.01694e-06	4.87709e-05	2.55908e-05	0.000399728	2.54009e-05	3.83759e-05	2.07112e-05	1.20734e-05	0.000174256	2	9.86691e-05	5.41635e-05	2.55908e-05	2.54009e-05	171.34	125.183	1.0001		0.992582
Q13867	3.99319e-05	3.27225e-05	4.91009e-05	0.000134791	0.00020607	3.2661e-05	4.55866e-05	0.000259438	3.44135e-05	4.03458e-05	3	9.25233e-05	8.2489e-05	4.91009e-05	4.03458e-05	81.7903	120.075	0.6901		0.821691
O75367	4.69928e-05	3.25248e-05	1.46731e-05	2.09428e-05	2.30724e-06	4.48117e-05	5.58842e-05	1.92717e-05	2.24814e-05	2.18366e-05	1	2.34881e-05	3.28571e-05	2.09428e-05	2.24814e-05	72.7188	50.1674	0.4211		1.07347
O15511	1.32249e-06	8.34702e-06	2.35302e-05	2.46643e-05	6.09674e-05	4.32301e-05	9.9644e-06	5.45419e-05	1.17282e-05	0.000154105	1	2.37663e-05	5.4714e-05	2.35302e-05	4.32301e-05	97.0102	107.589	0.4211		1.83722
Q6P4A8	1.902e-06	3.1635e-06	4.53919e-06	9.87211e-07	5.30492e-06	1.40612e-05	4.05303e-05	2.21644e-05	2.74492e-06	2.04871e-05	1	3.17936e-06	1.99976e-05	3.1635e-06	2.04871e-05	56.2746	68.9024	0.0561		6.47607
O15145	4.0471e-07	1.13497e-05	2.68716e-05	2.63569e-05	6.50081e-05	3.03877e-05	1.12168e-05	1.17695e-05	1.9926e-05	0.000147152	1	2.59982e-05	4.40905e-05	2.63569e-05	1.9926e-05	94.0658	131.854	0.8411		0.756006
P10768	0.000110498	8.78601e-05	1.96724e-05	1.76647e-05	2.01067e-05	5.06024e-05	0.00012684	5.54963e-05	9.5557e-06	0.000140198	1	5.11604e-05	7.65384e-05	2.01067e-05	5.54963e-05	87.1164	72.111	0.5481		2.7601
O95861	1.87194e-06	7.44126e-06	1.21396e-05	2.16528e-05	4.32568e-05	1.0198e-05	1.11358e-05	3.84387e-06	9.39818e-06	9.38404e-06	1	1.72725e-05	8.79199e-06	1.21396e-05	9.39818e-06	94.0045	32.5067	0.5481		0.774177
P30153	5.34758e-05	0.000127794	3.67576e-05	8.10104e-05	5.34064e-05	0.000116504	0.00014449	0.000137917	1.95797e-05	0.000120543	1	7.04889e-05	0.000107807	5.34758e-05	0.000120543	50.7243	47.0107	0.3101		2.25416
P25325	5.04341e-06	1.91987e-06	2.60499e-05	4.80236e-05	5.75558e-05	4.325e-06	3.83884e-05	2.10123e-05	1.31603e-05	9.62481e-06	1	2.77185e-05	1.73022e-05	2.60499e-05	1.31603e-05	89.9228	76.6153	0.6901		0.505196
P48594	5.25527e-05	4.38395e-05	0.000107441	4.3099e-05	5.64854e-05	3.1337e-05	6.76738e-05	8.38402e-05	4.78545e-05	0.000181595	2	6.06835e-05	8.24602e-05	5.25527e-05	6.76738e-05	44.0861	71.3836	0.6901		1.28773
P04004	1.16729e-05	8.02577e-06	9.31593e-06	4.4305e-06	2.2513e-05	4.48964e-05	9.58885e-06	4.96816e-05	1.69766e-05	3.98181e-05	1	1.11916e-05	3.21923e-05	9.31593e-06	3.98181e-05	61.2015	55.3035	0.0561		4.27419
Q15257	8.35596e-05	4.70669e-05	2.57494e-05	1.73179e-05	0.000111184	8.97205e-06	1.05892e-05	4.62311e-05	1.31204e-05	1.83317e-05	2	5.69756e-05	1.94489e-05	4.70669e-05	1.31204e-05	69.6066	79.107	0.0561		0.27876
Q14508	6.29177e-06	6.91613e-06	9.11853e-06	3.91007e-06	3.80773e-06	8.11348e-06	7.29542e-06	9.71808e-06	1.35333e-05	3.49834e-06	1	6.00885e-06	8.43173e-06	6.29177e-06	8.11348e-06	37.048	43.3383	0.3101		1.28954
P0DOX8	0.00166332	0.000675681	0.000698924	0.00079291	0.000826164	0.00145398	0.00206466	0.000429691	0.00135716	0.000773277	2	0.000931399	0.00121576	0.00079291	0.00135716	44.4432	52.2014	0.6901		1.71162
P01780	0.000215575	5.01762e-05	4.11739e-05	9.98816e-05	4.33631e-05	5.23691e-05	0.000105716	4.15576e-05	9.88748e-05	9.31847e-05	1	9.0034e-05	7.83404e-05	5.01762e-05	9.31847e-05	82.3929	37.3188	0.8411		1.85715
Q96CN7	1.6365e-05	2.50005e-05	1.82495e-05	3.15945e-05	0.000136453	2.18338e-05	4.23616e-05	2.56631e-05	2.59391e-05	2.16434e-05	3	4.55324e-05	2.74882e-05	2.50005e-05	2.56631e-05	112.403	31.1401	0.8411		1.0265
P02765	7.50025e-06	9.44156e-06	1.28633e-05	1.26575e-05	1.89362e-05	2.46654e-06	4.97484e-06	1.30186e-05	1.51228e-05	1.96079e-05	1	1.22798e-05	1.10381e-05	1.26575e-05	1.30186e-05	35.4244	64.7427	1.0001		1.02853
P62942	6.72659e-05	1.67042e-05	4.254e-05	3.40903e-05	7.24353e-05	5.83654e-05	6.05036e-05	3.22571e-05	2.11011e-05	2.62981e-05	2	4.66071e-05	3.9705e-05	4.254e-05	3.22571e-05	49.8739	46.4763	0.5481		0.758277
P07954	1.75995e-06	8.01272e-06	2.21135e-05	2.27449e-05	5.15428e-05	5.16201e-06	1.88196e-05	1.00696e-05	5.51082e-06	1.33262e-05	1	2.12348e-05	1.05777e-05	2.21135e-05	1.00696e-05	90.4533	54.0496	0.4211		0.45536
P02812	9.30549e-07	3.30428e-07	2.79261e-06	0.000508965	5.80048e-05	4.07014e-07	0.000440197	8.14215e-07	6.81686e-05	4.53752e-05	1	0.000114205	0.000110992	2.79261e-06	4.53752e-05	194.422	167.881	1.0001		16.2483
P15153	4.2468e-06	3.56442e-06	4.03511e-05	1.26696e-05	8.3677e-06	3.07985e-05	1.52057e-05	5.05621e-05	1.81757e-05	0.000189288	2	1.38399e-05	6.0806e-05	8.3677e-06	3.07985e-05	110.278	120.318	0.0561		3.68064
P61981	2.59509e-05	5.27833e-05	5.41963e-05	0.000148766	0.000204429	3.30554e-05	3.61837e-05	8.63773e-05	5.65507e-05	5.45431e-05	3	9.72251e-05	5.3342e-05	5.41963e-05	5.45431e-05	78.0873	39.8678	0.8411		1.0064
P01594	0.000191192	6.83792e-05	9.80074e-05	0.000109229	6.24407e-05	8.07549e-05	0.000195078	6.16939e-05	8.56463e-05	9.00798e-05	2	0.00010585	0.000102651	9.80074e-05	8.56463e-05	48.7355	51.4263	0.8411		0.873876
P0DP01	1.4512e-05	2.16442e-05	9.39365e-06	4.64733e-05	3.21429e-05	1.66084e-05	2.27687e-05	8.71704e-06	2.50121e-05	1.95887e-05	1	2.48332e-05	1.8539e-05	2.16442e-05	1.95887e-05	59.6195	34.2311	0.6901		0.905032
A0A0C4DH31	8.79348e-05	4.53435e-05	4.72232e-05	4.96855e-05	3.28359e-05	3.84796e-05	5.90103e-05	3.87035e-05	4.1828e-05	5.78992e-05	1	5.26046e-05	4.71841e-05	4.72232e-05	4.1828e-05	39.5251	22.0007	0.8411		0.885751
Q96QR1	0.00013897	0.000105359	5.31347e-05	1.47733e-05	1.77499e-05	5.78408e-05	2.55141e-05	3.1823e-05	0.00142876	7.35719e-05	2	6.59975e-05	0.000323503	5.31347e-05	5.78408e-05	82.9623	191.085	0.6901		1.08857
Q92597	2.15141e-06	8.0333e-06	1.48604e-05	4.08492e-05	3.33748e-05	6.15658e-06	3.90901e-06	7.91261e-06	1.71925e-05	5.76433e-06	2	1.98538e-05	8.18701e-06	1.48604e-05	6.15658e-06	83.5889	63.8982	0.3101		0.414293
P31949	0.000331012	3.80312e-05	2.80839e-06	0.000142582	0.000146922	0.00026961	0.000340457	7.97994e-05	1.41038e-05	0.000213579	1	0.000132271	0.00018351	0.000142582	0.000213579	96.7154	73.3148	0.5481		1.49794
Q15365	2.5838e-06	5.12581e-06	5.93194e-06	6.69435e-06	2.21638e-05	1.64627e-06	6.99334e-07	2.41773e-05	1.41689e-05	3.39709e-05	1	8.49995e-06	1.49325e-05	5.93194e-06	1.41689e-05	91.6865	96.3277	0.8411		2.38858
P35754	3.25734e-05	1.61474e-05	1.75606e-05	1.25751e-05	1.2774e-05	2.30495e-05	4.97201e-06	6.99284e-05	1.9792e-05	6.7539e-06	2	1.83261e-05	2.48991e-05	1.61474e-05	1.9792e-05	45.0151	105.945	1.0001		1.2257
P01700	0.0002435	0.000172741	0.000198125	0.000140794	0.00024755	0.000280084	0.000669987	0.00026354	0.000282976	0.000215038	2	0.000200542	0.000342325	0.000198125	0.000280084	22.856	54.095	0.0321		1.41367
P07477	3.17298e-06	1.4407e-06	4.02827e-07	1.12677e-06	8.73653e-07	3.75846e-07	3.23413e-06	1.72925e-06	1.00204e-06	4.79059e-07	1	1.40339e-06	1.36406e-06	1.12677e-06	1.00204e-06	75.5039	86.131	1.0001		0.889296
P22735	3.28152e-05	1.31466e-05	1.59979e-05	3.2211e-05	3.52153e-05	0.0001126	3.41492e-05	1.7195e-05	3.53378e-05	2.30803e-05	2	2.58772e-05	4.44724e-05	3.2211e-05	3.41492e-05	40.305	87.3266	0.3101		1.06017
O00764	4.26601e-05	3.57284e-05	2.61296e-06	3.81862e-05	2.73364e-05	2.7429e-05	8.58331e-06	1.88203e-05	1.09814e-05	4.97264e-05	1	2.93048e-05	2.31081e-05	3.57284e-05	1.88203e-05	54.3537	71.8811	0.6901		0.52676
Q86T26	3.43097e-06	2.97451e-06	1.18132e-05	4.79999e-07	1.83413e-05	7.44528e-06	4.4692e-06	3.10806e-06	6.99654e-06	1.30945e-06	1	7.40799e-06	4.6657e-06	3.43097e-06	4.4692e-06	100.658	55.5691	1.0001		1.30261
Q9UBH0	2.07598e-06	9.08649e-06	3.51662e-06	2.50406e-05	3.38018e-05	8.49433e-07	7.04226e-06	2.05784e-06	4.3136e-05	8.07795e-06	1	1.47043e-05	1.22327e-05	9.08649e-06	7.04226e-06	95.4378	143.486	0.5481		0.775025
P46976	1.65267e-06	3.0237e-06	1.42251e-05	1.98383e-05	2.38113e-05	6.3128e-05	2.67137e-05	3.35831e-05	9.76259e-06	0.00010991	1	1.25102e-05	4.86195e-05	1.42251e-05	3.35831e-05	79.1552	80.8638	0.0561		2.36084
O00204	1.1138e-05	1.08301e-06	1.78547e-05	1.14536e-05	5.73855e-05	9.78612e-06	5.29498e-06	1.81153e-05	3.45271e-06	1.07643e-05	1	1.9783e-05	9.48268e-06	1.14536e-05	9.78612e-06	110.5	60.1543	0.4211		0.854417
P28676	1.04e-05	1.95839e-05	1.078e-05	1.21504e-05	2.73498e-05	2.00467e-05	2.15846e-05	1.35713e-05	1.33388e-05	3.76427e-05	1	1.60528e-05	2.12368e-05	1.21504e-05	2.00467e-05	45.6789	46.6045	0.2221		1.64988
P80748	0.000166535	8.00714e-05	0.000138272	2.5798e-06	3.83771e-06	9.79182e-05	8.78132e-06	7.3092e-05	8.53863e-05	9.67039e-05	1	7.82591e-05	7.23763e-05	8.00714e-05	8.53863e-05	96.1827	51.0391	1.0001		1.06638
P08185	5.66825e-06	9.72228e-06	4.30831e-05	2.41524e-05	2.5912e-05	3.00464e-05	1.76073e-05	3.40959e-05	2.69706e-05	4.91022e-05	1	2.17076e-05	3.15645e-05	2.41524e-05	3.00464e-05	68.3853	36.5431	0.2221		1.24403
Q99436	3.18398e-05	1.30469e-05	2.24899e-05	3.35871e-05	0.000149456	1.889e-05	5.17694e-05	4.86437e-05	2.1701e-05	3.63663e-05	2	5.00839e-05	3.5474e-05	3.18398e-05	3.63663e-05	112.119	42.3901	0.8411		1.14216
P28799	1.24751e-05	2.56002e-06	3.73478e-06	9.99608e-06	7.8021e-06	6.94137e-06	6.23899e-06	1.52602e-05	2.16204e-05	1.3215e-05	2	7.31361e-06	1.26552e-05	7.8021e-06	1.3215e-05	56.9857	50.1771	0.2221		1.69377
P61086	9.40916e-05	5.69154e-05	0.000334778	5.72376e-05	0.000476616	9.81871e-05	9.13358e-05	2.18881e-05	8.22838e-05	5.96498e-05	3	0.000203928	7.06689e-05	9.40916e-05	8.22838e-05	93.9014	43.7309	0.5481		0.874507
Q15084	8.69164e-05	6.67428e-05	6.52428e-05	5.91386e-05	0.00013667	8.57868e-05	6.14222e-05	0.000128524	2.70534e-05	7.33995e-05	3	8.29422e-05	7.52371e-05	6.67428e-05	7.33995e-05	38.3392	49.1358	0.8411		1.09974
O14732	1.85668e-06	9.44556e-06	1.1331e-05	2.87521e-05	5.30063e-05	2.59242e-05	2.73597e-05	9.81623e-06	9.95652e-06	1.81762e-05	1	2.08783e-05	1.82466e-05	1.1331e-05	1.81762e-05	98.0969	45.9998	1.0001		1.60411
P61224	8.75869e-06	2.25675e-05	1.89659e-05	9.60411e-06	1.78277e-05	5.25925e-05	5.38556e-05	3.12779e-05	2.76134e-05	0.000124258	2	1.55448e-05	5.79194e-05	1.78277e-05	5.25925e-05	39.0746	67.279	0.0081		2.95005
P15814	0.000240168	0.000129791	0.000378431	0.000135771	0.000248662	1.13839e-05	0.000811796	0.00280238	0.00362267	0.00050401	2	0.000226565	0.00155045	0.000240168	0.000811796	44.8737	101.319	0.1511		3.38012
P04632	6.32817e-06	1.1881e-05	7.41508e-06	2.05131e-05	3.88436e-05	1.75706e-05	1.31853e-05	1.66249e-05	1.1248e-05	2.76443e-05	1	1.69962e-05	1.72546e-05	1.1881e-05	1.66249e-05	79.0169	36.7779	0.6901		1.39928
A0A075B6Q5	0.000280336	9.9478e-05	0.000238095	0.000109375	4.94286e-05	8.8545e-05	0.00019713	0.00011114	7.96796e-05	5.77955e-05	2	0.000155343	0.000106858	0.000109375	8.8545e-05	63.5012	50.5009	0.5481		0.809551
Q9UL52	7.62061e-06	5.61716e-06	8.96825e-06	2.00827e-06	5.03386e-07	2.33559e-05	4.7634e-06	1.56858e-05	2.32799e-05	4.79133e-07	1	4.94353e-06	1.35128e-05	5.61716e-06	1.56858e-05	73.0395	77.918	0.4211		2.79248
P13987	1.67512e-05	1.51544e-05	2.88629e-05	2.14967e-05	3.48919e-05	2.87928e-05	6.18987e-05	9.34938e-06	5.2831e-05	0.000123473	2	2.34314e-05	5.52691e-05	2.14967e-05	5.2831e-05	35.5611	78.4054	0.3101		2.45763
P08174	2.91835e-05	1.21723e-05	1.53726e-05	8.91991e-06	5.13834e-06	8.51128e-06	1.29665e-05	2.00722e-05	1.91175e-05	1.2263e-05	1	1.41573e-05	1.45861e-05	1.21723e-05	1.29665e-05	65.1197	33.5086	0.6901		1.06525
P49720	4.07561e-06	3.32113e-06	1.39355e-06	1.27769e-05	2.06214e-05	1.32123e-05	1.88369e-06	2.4469e-06	6.05788e-07	1.79086e-05	1	8.43772e-06	7.21145e-06	4.07561e-06	2.4469e-06	95.9349	108.56	0.6901		0.600376
Q15080	4.65131e-06	1.35937e-06	3.82503e-06	1.03653e-05	7.77482e-06	1.93082e-05	1.71595e-06	0.000155237	1.60825e-05	2.95991e-05	1	5.59516e-06	4.43886e-05	4.65131e-06	1.93082e-05	62.8539	141.397	0.0951		4.15113
P62993	2.80009e-06	1.36916e-05	2.01966e-06	3.02061e-06	1.46138e-05	2.99791e-05	1.22449e-05	9.90928e-06	4.5776e-06	2.05925e-05	1	7.22915e-06	1.54607e-05	3.02061e-06	1.22449e-05	87.6953	64.4147	0.2221		4.05377
Q8N257	3.21289e-05	5.93906e-05	1.94532e-05	2.61493e-05	8.41762e-06	0.000525045	4.0107e-05	3.36345e-05	2.77443e-05	3.16808e-05	2	2.91079e-05	0.000131642	2.61493e-05	3.36345e-05	65.55	167.092	0.2221		1.28625
P14174	3.09403e-05	1.19599e-05	3.21223e-05	3.13937e-05	0.000114704	0.00023095	0.00026354	1.68936e-05	1.72952e-05	1.51174e-05	2	4.4224e-05	0.000108759	3.13937e-05	1.72952e-05	91.1237	116.722	1.0001		0.550914
P69892	2.98199e-05	9.04887e-06	2.81006e-06	2.19175e-05	9.81444e-06	6.61181e-06	4.30667e-05	4.22096e-06	3.16129e-06	5.24047e-06	1	1.46822e-05	1.24602e-05	9.81444e-06	5.24047e-06	74.4455	137.693	0.5481		0.533955
P78371	2.89008e-05	6.13624e-06	1.02913e-05	2.59251e-05	4.34333e-05	4.80614e-06	6.94511e-05	1.94657e-05	3.82924e-06	1.87093e-05	1	2.29374e-05	2.32523e-05	2.59251e-05	1.87093e-05	65.6412	115.535	0.5481		0.721665
Q96S96	1.18179e-05	6.21767e-06	3.12641e-06	2.78466e-06	1.32534e-05	1.33817e-05	3.63588e-06	5.1636e-05	1.62255e-05	3.0424e-05	1	7.43999e-06	2.30606e-05	6.21767e-06	1.62255e-05	65.4111	80.7924	0.0561		2.60958
P41250	1.46354e-05	1.61065e-05	2.72401e-05	2.58952e-05	4.57895e-05	3.75643e-05	4.64722e-05	1.4396e-05	5.36952e-05	1.99071e-05	1	2.59333e-05	3.44069e-05	2.58952e-05	3.75643e-05	48.0146	49.0281	0.5481		1.45063
P05156	1.55814e-05	8.32766e-06	1.16573e-05	2.17964e-05	1.17757e-05	1.62746e-05	4.80324e-05	2.16953e-05	8.44505e-06	1.91111e-05	1	1.38277e-05	2.27117e-05	1.17757e-05	1.91111e-05	37.1838	66.0493	0.3101		1.62292
Q14894	2.33721e-05	8.12327e-06	3.37872e-05	6.8315e-05	0.000115238	1.74168e-05	3.07318e-05	2.49548e-05	3.91718e-05	2.63815e-05	2	4.9767e-05	2.77313e-05	3.37872e-05	2.63815e-05	85.938	28.8374	0.6901		0.780814
Q7Z4W1	1.12349e-05	5.73736e-06	4.05105e-06	7.066e-06	7.49276e-05	5.54446e-06	5.82424e-06	1.42239e-05	4.60137e-06	2.82178e-05	1	2.06034e-05	1.16824e-05	7.066e-06	5.82424e-06	147.957	85.8143	1.0001		0.824263
Q9GZN4	8.00003e-07	2.95722e-06	2.86458e-05	7.65687e-06	1.89027e-05	4.52644e-05	2.23154e-05	3.97509e-05	1.93481e-05	3.47517e-06	1	1.17925e-05	2.60308e-05	7.65687e-06	2.23154e-05	99.4895	64.4368	0.1511		2.91443
P01614	0.000632784	0.000227884	0.000441532	0.000521998	0.000307653	0.00043681	0.00115458	0.000332118	0.000446714	0.0001955	2	0.00042637	0.000513144	0.000441532	0.00043681	38.0848	72.6126	1.0001		0.989304
P27105	1.72226e-05	2.81574e-06	4.95049e-06	1.05069e-06	3.23149e-06	7.05844e-06	4.51468e-06	2.59758e-06	1.78414e-06	1.47235e-05	1	5.8542e-06	6.13568e-06	3.23149e-06	4.51468e-06	111.111	84.9555	1.0001		1.39709
P01031	4.79531e-06	2.94696e-06	3.10558e-06	4.71628e-06	1.61649e-06	1.72195e-05	4.16768e-05	1.49163e-05	4.19541e-06	1.88224e-05	1	3.43612e-06	1.93661e-05	3.10558e-06	1.72195e-05	38.898	70.83	0.0321		5.54471
P10153	1.91664e-05	2.00607e-05	3.75277e-06	2.68704e-06	3.21413e-05	1.9518e-05	6.0551e-06	3.17282e-05	4.85334e-05	3.88379e-05	1	1.55616e-05	2.89345e-05	1.91664e-05	3.17282e-05	79.5719	57.3682	0.2221		1.6554
P09104	8.85866e-06	5.50922e-06	4.70213e-05	3.67235e-05	3.97689e-05	3.41925e-05	7.27451e-05	7.17169e-06	2.22543e-05	6.81237e-05	1	2.75763e-05	4.08974e-05	3.67235e-05	3.41925e-05	68.989	70.0767	0.6901		0.931079
P11684	3.10704e-06	5.79727e-06	7.54758e-06	8.13301e-06	2.02028e-06	3.95204e-05	7.5864e-07	4.20407e-06	5.53757e-05	2.30619e-06	1	5.32104e-06	2.0433e-05	5.79727e-06	4.20407e-06	50.505	123.916	1.0001		0.725181
P26583	9.36615e-07	2.49592e-06	2.42775e-06	1.59137e-06	1.11367e-06	2.0102e-06	6.8735e-06	1.27554e-05	4.07596e-06	9.60706e-06	1	1.71307e-06	7.06442e-06	1.59137e-06	6.8735e-06	42.3027	60.6228	0.0321		4.31923
P19961	0.060707	0.0503535	0.0257976	0.0128272	0.00497778	0.0136779	0.0291855	0.0242471	0.015483	0.0137534	3	0.0309326	0.0192694	0.0257976	0.015483	77.3775	36.6164	0.8411		0.60017
P01703	4.42986e-05	1.59114e-05	4.72454e-05	2.305e-05	2.29032e-06	9.4057e-06	3.87526e-05	2.33343e-05	2.0708e-05	2.74865e-05	1	2.65591e-05	2.39374e-05	2.305e-05	2.33343e-05	71.8665	44.5086	1.0001		1.01233
P16401	3.38281e-06	6.61201e-05	5.95194e-06	1.38751e-05	5.42004e-06	3.17328e-06	3.20749e-06	2.37745e-06	2.13106e-06	5.72986e-05	1	1.895e-05	1.36376e-05	5.95194e-06	3.17328e-06	140.738	179.005	0.0951		0.53315
P01721	0.000157018	0.000132123	9.72473e-05	7.83528e-05	0.000138849	0.00010069	8.98447e-05	9.97661e-05	8.65491e-05	7.06125e-05	5	0.000120718	8.94925e-05	0.000132123	8.98447e-05	26.5927	13.6418	0.2221		0.680007
P01782	5.13812e-05	6.66916e-05	1.16586e-05	6.79331e-05	3.25441e-05	2.45189e-05	1.43529e-05	2.57488e-05	3.14609e-05	3.10608e-05	1	4.60417e-05	2.54285e-05	5.13812e-05	2.57488e-05	52.0649	27.2254	0.1511		0.501133
Q5SSG8	1.84871e-05	1.62464e-05	1.08501e-05	3.15811e-05	5.46486e-05	1.63711e-05	3.19741e-05	1.38254e-05	8.80693e-05	3.29584e-05	2	2.63627e-05	3.66397e-05	1.84871e-05	3.19741e-05	66.58	82.0107	0.5481		1.72954
P10619	3.81063e-06	5.68353e-06	8.07412e-06	2.19396e-05	1.42956e-05	2.08306e-05	7.81328e-06	1.61558e-05	8.45576e-06	3.24951e-05	1	1.07607e-05	1.71501e-05	8.07412e-06	1.61558e-05	68.7253	59.2321	0.3101		2.00094
Q9H008	2.08892e-05	2.24852e-05	2.17603e-06	3.05429e-05	8.45047e-05	2.02097e-05	3.58611e-05	6.66439e-07	1.0573e-05	2.05042e-05	1	3.21196e-05	1.75629e-05	2.24852e-05	2.02097e-05	96.7431	74.5016	0.3101		0.898799
A0A0A0MS14	0.000181755	5.43589e-05	9.68215e-05	0.000146168	6.80855e-05	8.12084e-05	9.36037e-05	0.000126943	8.72206e-05	0.000119944	1	0.000109438	0.000101784	9.68215e-05	9.36037e-05	48.9561	20.0455	1.0001		0.966765
A0A0B4J1X5	2.66119e-05	6.36344e-06	5.78212e-06	6.2621e-06	5.52135e-07	1.92204e-06	3.38434e-06	4.30853e-06	2.05816e-06	3.23432e-06	1	9.11433e-06	2.98148e-06	6.2621e-06	3.23432e-06	110.575	33.3817	0.1511		0.516491
P04430	5.1657e-05	9.10297e-06	1.60469e-05	1.98403e-05	9.67434e-06	1.61651e-05	2.5777e-05	4.49914e-05	1.93717e-05	3.18915e-05	1	2.12643e-05	2.76393e-05	1.60469e-05	2.5777e-05	82.6392	41.3571	0.3101		1.60635
P01611	0.000399864	0.000106664	0.000228677	0.000259466	0.000132215	0.000144004	0.000308706	0.000148233	0.00021656	0.000120188	1	0.000225377	0.000187538	0.000228677	0.000148233	51.7395	40.8709	0.8411		0.648221
A0A0B4J1V6	9.42423e-05	6.67811e-05	7.10199e-05	5.15318e-05	3.92279e-05	4.08737e-05	0.000134292	3.2383e-05	7.78198e-05	4.2071e-05	1	6.45606e-05	6.54879e-05	6.67811e-05	4.2071e-05	32.2976	64.4974	0.8411		0.629984
A0A0C4DH36	0.000208246	6.64994e-05	9.03579e-05	0.00020416	0.000101574	0.000136151	0.000292285	0.000206201	0.000222055	0.000116212	2	0.000134167	0.000194581	0.000101574	0.000206201	49.9253	36.3325	0.1511		2.03007
P27482	5.07983e-06	1.26495e-05	1.06725e-05	5.70561e-06	1.06404e-05	4.13551e-06	2.88869e-05	1.58874e-05	4.12757e-06	6.07485e-06	1	8.94958e-06	1.18225e-05	1.06404e-05	6.07485e-06	37.4841	90.6139	1.0001		0.570921
P45877	0.000111266	1.61361e-05	4.28961e-05	2.00676e-05	5.57735e-05	4.66591e-05	4.65668e-05	3.10065e-05	4.86496e-05	0.000138616	2	4.92278e-05	6.22997e-05	4.28961e-05	4.66591e-05	77.8642	69.4212	0.5481		1.08772
Q8NBS9	7.72778e-07	1.18902e-06	1.1685e-06	1.77288e-06	8.84677e-07	2.21737e-06	7.81927e-07	2.32539e-06	3.81863e-06	1.37445e-06	1	1.15757e-06	2.10355e-06	1.1685e-06	2.21737e-06	33.5205	54.6276	0.1511		1.89762
Q9ULZ3	4.14047e-05	1.11976e-05	1.03433e-05	1.36902e-05	3.36259e-05	2.63395e-05	2.27929e-05	1.80611e-05	9.47823e-06	1.6828e-05	2	2.20524e-05	1.86999e-05	1.36902e-05	1.80611e-05	65.4514	34.2484	1.0001		1.31927
Q8N1Q1	3.11587e-06	2.55687e-06	3.63548e-06	3.81144e-06	1.51488e-05	8.56232e-06	2.49162e-06	5.36768e-06	3.73934e-05	7.39848e-06	1	5.6537e-06	1.22427e-05	3.63548e-06	7.39848e-06	94.2828	116.372	0.4211		2.03508
P61077	2.92565e-06	1.02419e-06	2.49772e-05	2.04373e-06	4.49151e-05	3.10635e-05	3.85564e-05	3.05349e-06	1.90624e-05	1.05066e-05	1	1.51772e-05	2.04485e-05	2.92565e-06	1.90624e-05	127.732	71.0331	0.4211		6.5156
P08519	1.26392e-06	1.09339e-06	6.1963e-06	3.48966e-06	4.01493e-06	2.45763e-05	1.21269e-05	5.34007e-05	5.14556e-06	1.30391e-06	1	3.21164e-06	1.93107e-05	3.48966e-06	1.21269e-05	65.8882	108.821	0.0951		3.47509
P35326	1.52716e-05	9.61699e-06	3.55113e-06	1.1139e-06	5.70289e-05	9.12513e-06	1.80548e-05	2.47291e-06	3.09756e-06	6.90452e-06	1	1.73165e-05	7.93099e-06	9.61699e-06	6.90452e-06	132.083	79.276	0.6901		0.71795
P35321	3.21006e-06	2.11454e-06	9.55237e-07	4.67392e-06	2.096e-05	4.27325e-06	5.64247e-06	6.14614e-06	3.7119e-06	4.10149e-06	1	6.38276e-06	4.77505e-06	3.21006e-06	4.27325e-06	129.47	22.1337	0.4211		1.3312
P25815	7.3526e-06	2.85313e-05	7.12217e-06	1.04823e-05	1.88601e-05	0.000188276	1.78866e-05	3.92506e-06	1.92372e-05	8.39189e-05	1	1.44697e-05	6.26487e-05	1.04823e-05	1.92372e-05	63.4856	122.532	0.4211		1.83522
P08493	8.63215e-06	1.27345e-06	4.86943e-06	3.8992e-06	4.76694e-06	2.84846e-06	3.38864e-06	2.32835e-05	3.54085e-05	2.46261e-05	1	4.68823e-06	1.7911e-05	4.76694e-06	2.32835e-05	56.3097	79.836	0.4211		4.88437
O60547	6.35717e-07	3.66004e-06	1.30134e-05	1.2355e-05	4.92847e-05	2.32788e-06	1.27774e-06	2.90061e-06	2.22441e-06	1.93949e-06	1	1.57898e-05	2.13403e-06	1.2355e-05	2.22441e-06	123.384	27.7668	0.1511		0.180042
P28072	9.52453e-06	1.2609e-05	7.40952e-06	3.52763e-05	8.79799e-05	1.63982e-05	2.09915e-05	1.82986e-05	2.30892e-06	3.53279e-05	1	3.05599e-05	1.8665e-05	1.2609e-05	1.82986e-05	111.208	63.1573	1.0001		1.45123
Q9BS26	4.80404e-05	3.8167e-05	4.32839e-05	4.7978e-05	0.000146554	3.41761e-05	6.37058e-05	4.0162e-05	5.41348e-05	4.71988e-05	2	6.48047e-05	4.78755e-05	4.7978e-05	4.71988e-05	70.7973	24.2107	0.8411		0.98376
P06727	1.55864e-05	3.89271e-06	6.55495e-06	2.18391e-05	3.87863e-06	9.11581e-06	2.06028e-05	3.5445e-05	2.61129e-05	5.21651e-06	2	1.03504e-05	1.92986e-05	6.55495e-06	2.06028e-05	77.5026	64.0335	0.2221		3.14308
A0A075B6I0	0.000114766	4.92432e-05	0.000134543	3.59561e-05	1.70667e-05	2.86672e-05	0.000173731	4.77926e-05	5.6806e-05	2.58195e-05	1	7.0315e-05	6.65633e-05	4.92432e-05	4.77926e-05	73.0762	92.0864	1.0001		0.970541
P61604	7.83e-06	4.09983e-06	3.42109e-06	1.85598e-06	1.37709e-05	1.28012e-05	1.53706e-06	2.48393e-06	2.41279e-06	4.5341e-05	1	6.19556e-06	1.29152e-05	4.09983e-06	2.48393e-06	76.9768	144.856	0.8411		0.605861
Q99598	3.24151e-05	1.70114e-05	5.27594e-05	2.64479e-05	2.08431e-05	7.00447e-05	2.20248e-05	9.83891e-05	3.89912e-05	9.80106e-05	1	2.98954e-05	6.54921e-05	2.64479e-05	7.00447e-05	46.9772	52.6288	0.0951		2.64841
Q9HD89	0.000131871	0.000149855	5.24325e-05	6.23079e-06	8.30651e-06	3.96541e-05	0.000176924	1.23552e-05	6.55049e-05	3.24156e-05	1	6.97393e-05	6.53708e-05	5.24325e-05	3.96541e-05	97.2151	99.7332	0.8411		0.756289
P22626	3.11859e-05	2.08088e-05	1.2838e-05	2.97367e-05	7.08489e-05	5.72501e-05	1.48069e-05	4.28046e-05	1.53172e-05	0.000102139	1	3.30836e-05	4.64636e-05	2.97367e-05	4.28046e-05	67.615	77.6127	0.6901		1.43945
P08571	8.53445e-06	0.000108597	2.8211e-05	1.72967e-05	1.84973e-05	3.56032e-05	2.7702e-05	6.39444e-05	0.000112255	5.34107e-05	2	3.62272e-05	5.85831e-05	1.84973e-05	5.34107e-05	113.319	56.7291	0.1511		2.88748
A0A0B4J1U7	0.000107262	2.08854e-05	1.13887e-06	2.5221e-05	2.32116e-06	1.86915e-05	9.53084e-05	8.95113e-06	3.23843e-05	1.42119e-05	1	3.13656e-05	3.39094e-05	2.08854e-05	1.86915e-05	139.564	104.417	0.8411		0.894954
Q9UHL4	5.49366e-07	6.50836e-06	4.78851e-06	4.01871e-06	7.89115e-06	3.93756e-05	7.40693e-06	7.27763e-06	4.37897e-06	6.39106e-06	1	4.75122e-06	1.2966e-05	4.78851e-06	7.27763e-06	58.7254	114.244	0.3101		1.51981
Q99102	3.60669e-05	6.64507e-06	2.04416e-06	4.32122e-06	3.70372e-05	3.25994e-06	5.67355e-06	3.32278e-06	1.18772e-05	2.37403e-06	1	1.72229e-05	5.30149e-06	6.64507e-06	3.32278e-06	102.905	73.0735	0.4211		0.500037
P02654	7.17827e-06	3.02318e-05	7.79217e-05	2.49219e-05	1.79235e-05	8.19833e-06	4.75694e-05	9.9037e-05	2.8085e-05	0.00198732	1	3.16354e-05	0.000434042	2.49219e-05	4.75694e-05	86.2157	200.203	0.3101		1.90874
P84095	1.82731e-05	1.28433e-05	4.31993e-06	3.62842e-06	4.62805e-06	1.36754e-05	1.53171e-05	1.04446e-05	2.7497e-06	3.60417e-05	2	8.73856e-06	1.56457e-05	4.62805e-06	1.36754e-05	74.6665	79.1457	0.5481		2.95489
P61106	0.000108628	0.000139721	2.14219e-05	0.000173046	0.000238671	0.000240665	7.35414e-05	0.00043217	2.7946e-05	0.000397912	2	0.000136298	0.000234447	0.000139721	0.000240665	58.9291	78.1816	0.4211		1.72247
P34896	6.47818e-05	3.28934e-05	1.98658e-05	8.69839e-06	3.13272e-05	1.16478e-05	3.81476e-05	6.60891e-05	2.03245e-05	1.55573e-05	1	3.15133e-05	3.03533e-05	3.13272e-05	2.03245e-05	66.6558	73.8005	1.0001		0.648782
P0DOX6	0.000310618	0.000114903	8.4443e-05	0.000157744	6.01498e-05	2.42817e-05	8.15981e-05	0.000101651	0.000288301	0.000145685	2	0.000145572	0.000128304	0.000114903	0.000101651	68.1451	77.5629	0.6901		0.884669
Q8WWA0	8.43002e-06	9.85434e-06	3.98169e-06	1.93362e-05	1.15127e-05	5.44538e-05	3.67164e-05	1.0633e-05	3.36177e-05	9.77304e-06	2	1.0623e-05	2.90388e-05	9.85434e-06	3.36177e-05	52.8791	65.2432	0.1511		3.41146
Q16378	2.07965e-05	4.98552e-06	5.30879e-06	4.53183e-05	2.81764e-05	1.06077e-05	1.21882e-05	6.38396e-06	0.00016262	1.85863e-05	1	2.09171e-05	4.20773e-05	2.07965e-05	1.21882e-05	80.9055	160.486	1.0001		0.58607
Q32P51	0.000221071	0.000259047	0.000330081	9.09791e-05	5.23363e-05	0.000120305	0.000278674	3.72871e-05	0.000178417	0.000140298	1	0.000190703	0.000150996	0.000221071	0.000140298	60.9887	58.3395	0.6901		0.634627
P08637	8.06206e-06	6.09089e-06	8.86618e-05	7.99714e-06	2.71349e-05	8.1314e-05	1.72148e-05	1.25283e-05	4.43685e-05	3.96448e-05	1	2.75894e-05	3.90141e-05	8.06206e-06	3.96448e-05	127.601	70.1376	0.3101		4.91745
P49591	2.38051e-06	2.24224e-06	1.85097e-06	1.15083e-05	2.54461e-05	2.39421e-06	3.66953e-06	3.48548e-06	3.4394e-06	8.57988e-06	1	8.68564e-06	4.3137e-06	2.38051e-06	3.48548e-06	117.535	56.4875	0.6901		1.46417
Q02790	1.20717e-05	6.963e-06	1.88157e-05	1.77778e-05	4.89182e-05	1.7691e-05	8.64616e-06	3.62484e-05	1.996e-05	2.22507e-05	2	2.09093e-05	2.09592e-05	1.77778e-05	1.996e-05	78.268	47.6352	0.6901		1.12274
Q8TDQ7	0.000107614	0.000590134	0.000638951	0.000431015	8.0216e-06	1.36404e-05	1.59114e-05	3.29198e-05	1.1543e-05	1.59198e-05	1	0.000355147	1.79869e-05	0.000431015	1.59114e-05	80.0491	47.5003	0.1511		0.0369161
P15515	0.00104952	0.00039962	0.00217454	0.000390751	0.000198812	4.57191e-06	8.6474e-05	8.84917e-05	0.000150352	0.000118701	1	0.000842649	8.97182e-05	0.00039962	8.84917e-05	96.2598	60.4829	0.0081	-4.5159	0.22144
P06865	5.23563e-05	7.47106e-06	0.000408742	3.69083e-05	3.72637e-05	0.000114556	3.60153e-05	0.000236876	5.53663e-05	3.72257e-05	1	0.000108548	9.60079e-05	3.72637e-05	5.53663e-05	155.323	88.5252	0.6901		1.4858
P21926	2.78294e-05	1.41811e-05	9.45512e-06	3.75608e-05	5.27926e-05	0.000114866	4.36269e-05	6.50951e-05	5.68904e-05	1.44518e-05	1	2.83638e-05	5.8986e-05	2.78294e-05	5.68904e-05	62.0831	62.1946	0.0951		2.04426
Q9Y490	5.89714e-06	2.14099e-06	2.94248e-06	5.68107e-06	2.86807e-06	1.17681e-06	3.34162e-06	1.36817e-05	2.67128e-06	1.40034e-06	1	3.90595e-06	4.45434e-06	2.94248e-06	2.67128e-06	44.7787	117.531	0.5481		0.907832
P0DP09	0.00041839	1.11816e-05	6.2325e-05	2.07311e-05	0.000220266	0.000214469	5.86707e-05	1.40505e-05	5.7554e-05	0.000256271	1	0.000146579	0.000120203	6.2325e-05	5.86707e-05	118.45	89.5819	1.0001		0.941367
P01601	1.49432e-05	1.38627e-05	1.08036e-05	2.08358e-05	1.66712e-05	1.52666e-05	3.77078e-05	3.02353e-05	8.73802e-06	2.24873e-05	1	1.54233e-05	2.2887e-05	1.49432e-05	2.24873e-05	24.0117	50.3928	0.3101		1.50485
P26885	7.18695e-06	8.63525e-06	3.82473e-06	5.0906e-05	3.06811e-05	1.26475e-05	2.68226e-05	4.96104e-05	2.09908e-05	2.71969e-05	1	2.02468e-05	2.74537e-05	8.63525e-06	2.68226e-05	99.5171	49.9559	0.5481		3.10618
P40227	5.25813e-05	9.26302e-05	5.80567e-06	1.77322e-05	2.87142e-05	0.000116401	3.35382e-05	1.27477e-05	6.1779e-06	6.59502e-06	1	3.94927e-05	3.5092e-05	2.87142e-05	1.27477e-05	86.9755	133.364	0.8411		0.443953
P27169	4.12983e-06	4.85015e-06	2.1152e-05	1.6758e-05	3.71245e-06	2.59962e-05	2.66349e-05	1.46516e-05	8.67129e-06	2.28014e-05	1	1.01205e-05	1.97511e-05	4.85015e-06	2.28014e-05	81.2521	39.5805	0.0951		4.70118
P62857	1.10664e-05	1.52117e-05	7.50679e-06	9.90236e-06	1.36063e-05	8.06889e-06	4.96726e-05	1.64744e-05	1.37948e-05	0.000173225	1	1.14587e-05	5.22471e-05	1.10664e-05	1.64744e-05	26.503	133.129	0.1511		1.48869
P16070	1.61361e-05	3.12407e-05	4.2854e-05	4.035e-05	2.25736e-05	5.58676e-05	2.89218e-05	3.31068e-05	4.61348e-05	3.61865e-05	1	3.06309e-05	4.00435e-05	3.12407e-05	3.61865e-05	37.1964	27.1903	0.3101		1.15831
P0DSN7	0.000509509	5.62373e-05	0.000127888	0.000137354	0.000149637	0.000336863	0.000557059	0.00011004	0.000150236	0.0001342	2	0.000196125	0.00025768	0.000137354	0.000150236	91.2277	73.7572	0.5481		1.09379
P0C0L4	6.81084e-06	9.92569e-06	2.90967e-06	9.94718e-06	6.93701e-06	2.99649e-05	6.88118e-06	1.20577e-05	5.48754e-06	0.000121822	1	7.30608e-06	3.52426e-05	6.93701e-06	1.20577e-05	39.6384	140.097	0.3101		1.73817
P68431	2.19925e-06	7.21482e-06	7.9434e-06	7.28587e-06	2.60771e-06	4.6493e-06	6.34934e-06	1.03582e-05	0.000182811	0.000197014	1	5.45021e-06	8.02363e-05	7.21482e-06	1.03582e-05	51.3644	124.965	0.2221		1.43568
P01766	7.4476e-05	1.6944e-05	0.000275302	8.62416e-05	3.23932e-05	5.79209e-05	4.64908e-05	9.83692e-05	1.01957e-05	7.80394e-05	1	9.70713e-05	5.82032e-05	7.4476e-05	5.79209e-05	106.807	57.2984	0.8411		0.777713
A0A0C4DH25	0.000159858	3.28767e-06	0.000201405	0.000141363	0.000108629	0.000116454	0.000366323	0.000191161	0.000202896	0.000131661	1	0.000122909	0.000201699	0.000141363	0.000191161	60.8588	49.1968	0.3101		1.35227
P01743	9.2285e-05	2.77891e-05	5.30067e-05	3.96722e-05	1.53541e-05	8.16737e-06	7.86099e-05	2.26205e-05	5.92005e-05	4.71857e-05	1	4.56214e-05	4.31568e-05	3.96722e-05	4.71857e-05	64.8529	65.2978	1.0001		1.18939
P22531	4.62089e-06	8.91497e-06	1.5475e-06	8.44424e-06	3.18156e-05	5.34802e-06	9.55473e-06	8.50958e-07	2.25352e-05	5.6972e-06	1	1.10686e-05	8.79722e-06	8.44424e-06	5.6972e-06	108.244	94.0729	1.0001		0.674684
P22528	1.09123e-06	1.67512e-05	8.7758e-07	1.6624e-06	2.38176e-05	1.3197e-06	3.96719e-06	4.12594e-06	1.2424e-05	5.37977e-07	1	8.83999e-06	4.47495e-06	1.6624e-06	3.96719e-06	121.557	105.422	0.8411		2.38642
A0A0A0MT36	4.96651e-05	2.02e-06	1.58921e-06	2.06599e-06	1.98523e-05	7.17894e-06	2.12142e-05	6.04552e-06	1.27805e-05	6.50251e-06	1	1.50385e-05	1.07443e-05	2.06599e-06	7.17894e-06	138.721	60.0564	0.5481		3.47482
Q92611	5.85374e-07	2.32369e-07	2.89418e-07	4.76942e-07	1.30725e-07	6.15981e-06	8.23663e-07	1.60336e-06	2.31401e-07	5.20996e-06	1	3.42965e-07	2.80564e-06	2.89418e-07	1.60336e-06	53.9327	96.0227	0.0951		5.53996
Q86VR7	1.20933e-06	4.46698e-06	8.83788e-06	1.24082e-05	8.57474e-06	1.84822e-06	1.34369e-05	1.9559e-06	3.53998e-06	2.70879e-06	1	7.09943e-06	4.69795e-06	8.57474e-06	2.70879e-06	60.9946	104.986	0.5481		0.315903
Q9Y5S8	3.20177e-06	6.59801e-06	1.15975e-05	3.34277e-06	3.86079e-06	2.23134e-05	4.44779e-06	4.01298e-06	3.13275e-06	2.91011e-06	1	5.72017e-06	7.36341e-06	3.86079e-06	4.01298e-06	62.2794	113.819	0.8411		1.03942
Q9HAT2	4.99558e-06	1.89003e-05	1.38481e-05	9.0547e-06	9.74333e-06	1.26511e-06	1.63281e-05	5.04151e-06	1.08658e-05	7.76115e-06	1	1.13084e-05	8.25233e-06	9.74333e-06	7.76115e-06	46.6812	69.4582	0.5481		0.79656
Q6VUC0	2.59211e-05	1.29249e-05	0.000161439	1.53286e-05	1.13261e-05	2.14218e-05	2.87509e-06	2.95372e-05	3.19897e-05	2.80528e-05	1	4.5388e-05	2.27753e-05	1.53286e-05	2.80528e-05	143.483	51.7812	0.6901		1.83009
Q9H299	1.95616e-05	1.57948e-05	1.41651e-05	3.13245e-05	3.59393e-05	4.63016e-05	1.71659e-05	6.52932e-06	1.2859e-05	1.14614e-05	1	2.33571e-05	1.88634e-05	1.95616e-05	1.2859e-05	41.6129	83.766	0.3101		0.657361
Q9GZM7	1.40485e-06	1.74183e-05	2.58048e-05	1.77363e-06	2.91731e-06	1.89163e-05	2.04678e-05	1.66563e-06	1.15449e-05	6.73994e-06	1	9.86378e-06	1.18669e-05	2.91731e-06	1.15449e-05	112.944	67.1669	0.6901		3.95739
Q6EEV6	3.59879e-06	3.84733e-06	3.45558e-06	4.22042e-06	1.34592e-05	4.79376e-06	4.58113e-06	3.14442e-06	5.92108e-06	1.54342e-06	1	5.71626e-06	3.99676e-06	3.84733e-06	4.58113e-06	75.8912	42.2855	1.0001		1.19073
Q5H9S7	9.18608e-05	2.09922e-05	1.1306e-05	9.53606e-05	4.93907e-05	2.30082e-05	2.03327e-05	7.48064e-05	0.0001376	2.75857e-06	1	5.3782e-05	5.17011e-05	4.93907e-05	2.30082e-05	72.4758	106.447	0.8411		0.46584
Q01629	3.42475e-06	7.45364e-07	2.30546e-06	2.40222e-06	1.49083e-06	9.31075e-06	1.03835e-06	1.13364e-06	8.50186e-06	1.26794e-05	1	2.07372e-06	6.5328e-06	2.30546e-06	8.50186e-06	48.7689	79.8022	0.4211		3.68771
P60985	1.29543e-05	3.23551e-05	8.61107e-05	9.25092e-05	2.07668e-05	1.45181e-05	4.10816e-06	7.44936e-06	1.9973e-05	2.024e-05	1	4.89392e-05	1.32577e-05	3.23551e-05	1.45181e-05	76.7529	55.0269	0.0561		0.448713
O75072	3.49779e-06	5.51523e-06	3.1252e-05	1.32102e-05	1.63589e-05	8.48868e-06	2.6244e-05	7.04057e-07	7.0438e-06	1.12012e-05	1	1.39668e-05	1.07363e-05	1.32102e-05	8.48868e-06	78.9287	88.3664	0.6901		0.642583
P61006	3.6514e-06	6.29565e-06	5.19777e-05	9.62017e-06	9.0774e-05	5.89663e-05	7.27155e-06	6.7793e-05	6.62911e-05	1.33143e-05	1	3.24638e-05	4.27273e-05	9.62017e-06	5.89663e-05	117.475	69.9146	0.4211		6.12945
P01706	4.52695e-05	3.18496e-05	4.97793e-05	4.32507e-05	2.89644e-05	2.77148e-05	3.46489e-05	1.0859e-05	4.48771e-05	7.32867e-05	1	3.98227e-05	3.82773e-05	4.32507e-05	3.46489e-05	22.5312	60.5083	0.6901		0.801117
Q562R1	7.6471e-06	9.34122e-06	1.53546e-06	1.11032e-05	8.7007e-06	2.26479e-06	1.4633e-05	2.29369e-05	6.47937e-06	4.27375e-05	1	7.66554e-06	1.78103e-05	8.7007e-06	1.4633e-05	47.6091	90.0018	0.4211		1.68182
P15309	1.26246e-05	2.19147e-05	1.4298e-05	2.52045e-05	4.068e-05	2.86777e-05	8.54042e-06	1.42771e-05	5.91731e-06	3.0807e-06	1	2.29444e-05	1.20986e-05	2.19147e-05	8.54042e-06	48.8242	83.8645	0.1511		0.389711
sp|I00001|MALE_GFP	1.21945e+08	1.09604e+08	1.23979e+08	1.71297e+08	1.70953e+08	1.74885e+08	1.31777e+08	2.20278e+08	1.60531e+08	1.8473e+08
Total Protein Sum	5.32756e+08	6.41901e+08	1.03044e+09	1.44045e+09	1.71178e+09	8.27692e+08	6.36196e+08	1.09043e+09	1.18645e+09	1.0194e+09
