# Supplementary material for: Saliva for Diabetes’ Complications: Non-Invasive Diagnostics and Monitoring
Source: Preprints.org preprint supplement (doi:10.20944/preprints202309.0994.v1), 2023-09-14
Supplement: Supplementary file 2 [file Table S1.xlsx]

## Sheet: Protein FDR Summary
	Protein-Level FDR Analysis
	Proteins Identified at Critical False Discovery Rates															Correspondence between FDR Levels and ProteinPilot Reported Confidences
		Number of Proteins Detected															Corresponding ProteinPilot Confidence
	Critical FDR	Local FDR	Global FDR	Global FDR from Fit												Critical FDR	Local FDR	Global FDR	Global FDR from Fit
	0.01	852	984	989												0.01	0.99	0.704879	0.683772
	0.05	917	1097	1103												0.05	0.941116	0.25869	0.241422
	0.1	954	1228	1188												0.1	0.830176	0.148862	0.129036
	* It is recommended you use numbers in bold and avoid using numbers in italics.																Corresponding Unused ProtScore
																Critical FDR	Local FDR	Global FDR	Global FDR from Fit
																0.01	2	0.53	0.5
																0.05	1.23	0.13	0.12
																0.1	0.77	0.07	0.06
