# Supplementary material for: Saliva for Diabetes’ Complications: Non-Invasive Diagnostics and Monitoring
Source: Preprints.org preprint supplement (doi:10.20944/preprints202309.0994.v1), 2023-09-14
Supplement: Supplementary file 4 [file Table S3.xlsx]

## Sheet: Table S4
UniProtKB AC	Protein name	Gene Name	Fold change	VIP
P04280	Basic salivary proline-rich protein 1	PRB1	-20	2
P18510	Interleukin-1 receptor antagonist protein	IL1RN	-5.88	2
P43251	Biotinidase	BTD	-3.57	2
P14550	Aldo-keto reductase family 1 member A1	AKR1A1	-2.78	2
A8K2U0	Alpha-2-macroglobulin-like protein 1	A2ML1	-2.78	2
Q6ZVX7	F-box only protein 50	NCCRP1	-2.78	2
P36952	Serpin B5	SERPINB5	-2.7	2
P13716	Delta-aminolevulinic acid dehydratase	ALAD	-2.27	2
Q9Y5Z4	Heme-binding protein 2	HEBP2	-2.04	2
P06870	Kallikrein-1	KLK1	-1.59	2
Q16658	Fascin	FSCN1	-1.56	2
O95274	Ly6/PLAUR domain-containing protein 3	LYPD3	-1.45	2
Q13162	Peroxiredoxin-4	PRDX4	1.97	1.9
P43652	Afamin	AFM	2.18	2
P02679	Fibrinogen gamma chain	FGG	2.34	2
P02763	Alpha-1-acid glycoprotein 1	ORM1	2.42	2
P01011	Alpha-1-antichymotrypsin	SERPINA3	2.6	2
P01009	Alpha-1-antitrypsin	SERPINA1	2.75	2
P84077	ADP-ribosylation factor 1	ARF1	2.82	1.8
P61224	Ras-related protein Rap-1b	RAP1B	2.95	2
Q9HC84	Mucin-5B	MUC5B	3.11	1.8
P02790	Hemopexin	HPX	3.38	1.8
P04217	Alpha-1B-glycoprotein	A1BG	3.39	1.8
P02751	Fibronectin	FN1	3.46	2
Q6UX06	Olfactomedin-4	OLFM4	3.52	2
P55058	Phospholipid transfer protein	PLTP	3.72	2
P04196	Histidine-rich glycoprotein	HRG	3.79	1.8
P36222	Chitinase-3-like protein 1	CHI3L1	3.85	1.9
P48595	Serpin B10	SERPINB10	4.06	2
P41218	Myeloid cell nuclear differentiation antigen	MNDA	4.16	2
P02749	Beta-2-glycoprotein 1	APOH	4.36	1.8
Q99880	Histone H2B type 1-L	H2BC13	4.88	1
P01031	Complement C5	C5	5.54	2
Q05315	Galectin-10	CLC	6.18	2,0
P02647	Apolipoprotein A-I	APOA1	7.74	1.7
P59665	Neutrophil defensin 1	DEFA1; DEFA1B	8	2
P69905	Hemoglobin subunit alpha	HBA1; HBA2	9.2	2
P68871	Hemoglobin subunit beta	HBB	22.7	2
